# Continuum descriptions of spatial spreading for heterogeneous cell populations: theory and experiment

Oleksii M Matsiaka<sup>1</sup>, Ruth E Baker<sup>2</sup>, \*Matthew J Simpson<sup>1</sup>

<sup>1</sup> *School of Mathematical Sciences, Queensland University of Technology (QUT)  
Brisbane, Queensland, Australia.*

<sup>2</sup> *Mathematical Institute, University of Oxford, Radcliffe Observatory Quarter,  
Woodstock Road, Oxford, United Kingdom.*

---

## Abstract

Variability in cell populations is frequently observed in both *in vitro* and *in vivo* settings. Intrinsic differences within populations of cells, such as differences in cell sizes or differences in rates of cell motility, can be present even within a population of cells from the same cell line. We refer to this variability as cell *heterogeneity*. Mathematical models of cell migration, for example, in the context of tumour growth and metastatic invasion, often account for both undirected (random) migration and directed migration that is mediated by cell-to-cell contacts and cell-to-cell adhesion. A key feature of standard models is that they often assume that the population is composed of identical cells with constant properties. This leads to relatively simple single-species *homogeneous* models that neglect the role of heterogeneity. In this work, we use a continuum modelling approach to explore the role of heterogeneity in spatial spreading of cell populations. We employ a three-species heterogeneous model of cell motility that explicitly incorporates different types of experimentally-

motivated heterogeneity in cell sizes: (i) monotonically decreasing; (ii) uniform; (iii) non-monotonic; and (iv) monotonically increasing distributions of cell size. Comparing the density profiles generated by the three-species heterogeneous model with density profiles predicted by a more standard single-species homogeneous model reveals that when we are dealing with monotonically decreasing and uniform distributions a simple and computationally efficient single-species homogeneous model can be remarkably accurate in describing the evolution of a heterogeneous cell population. In contrast, we find that the simpler single-species homogeneous model performs relatively poorly when applied to non-monotonic and monotonically increasing distributions of cell sizes. Additional results for heterogeneity in parameters describing both undirected and directed cell migration are also considered, and we find that similar results apply.

*Key words:* Cell migration; heterogeneity; continuum description; scratch assay

---

---

\* Corresponding author

*Email address:* `matthew.simpson@qut.edu.au`, *Telephone* + 617 31385241, *Fax* + 617 3138 2310 (\*Matthew J Simpson<sup>1</sup>).

## 1 Introduction

*In vitro* cell migration experiments play an important role in the discovery and testing of putative drug treatments, the study of malignant tumour growth and metastasis, as well as tissue regeneration and repair (Savla et al., 2004; Sengers et al., 2007; Tremel et al., 2009; Sarapata and de Pillis, 2010; Gerlee, 2013; Edmondson et al., 2014; Shah et al., 2016). Mathematical models of many biological processes involved in these experiments normally require certain assumptions to make the problem mathematically and computationally tractable. When modelling large populations of cells, one of the most intuitive approaches is to assume that all cells have fixed properties, such as assuming all cells have constant size and constant diffusivity (Sherratt and Murray, 1990; Galle et al., 2005; Simpson et al., 2013). In this framework a cell population is considered to be a *homogeneous* population, and single-species homogeneous models are routinely invoked (Maini et al., 2004a; Maini et al., 2004b; Sepulveda et al., 2013; Simpson et al., 2013; George et al., 2017; Vo et al., 2015). Single-species homogeneous models are much less computationally expensive than more elaborate multi-species heterogeneous models and, as a result, are frequently used relative to multi-species counterparts. In addition, multi-species frameworks usually involve a significantly larger number of free model parameters that we may have little prior knowledge about and so the process of calibrating multi-species heterogeneous models to match experimental observations is significantly more challenging than calibrating single-species homogeneous models. This is an important consideration because it is well-known that parameterising mathematical models of biological processes can be challenging, often requiring computationally-intensive methods (Pozzobon

26 and Perré, 2018; Warne et al. 2019).

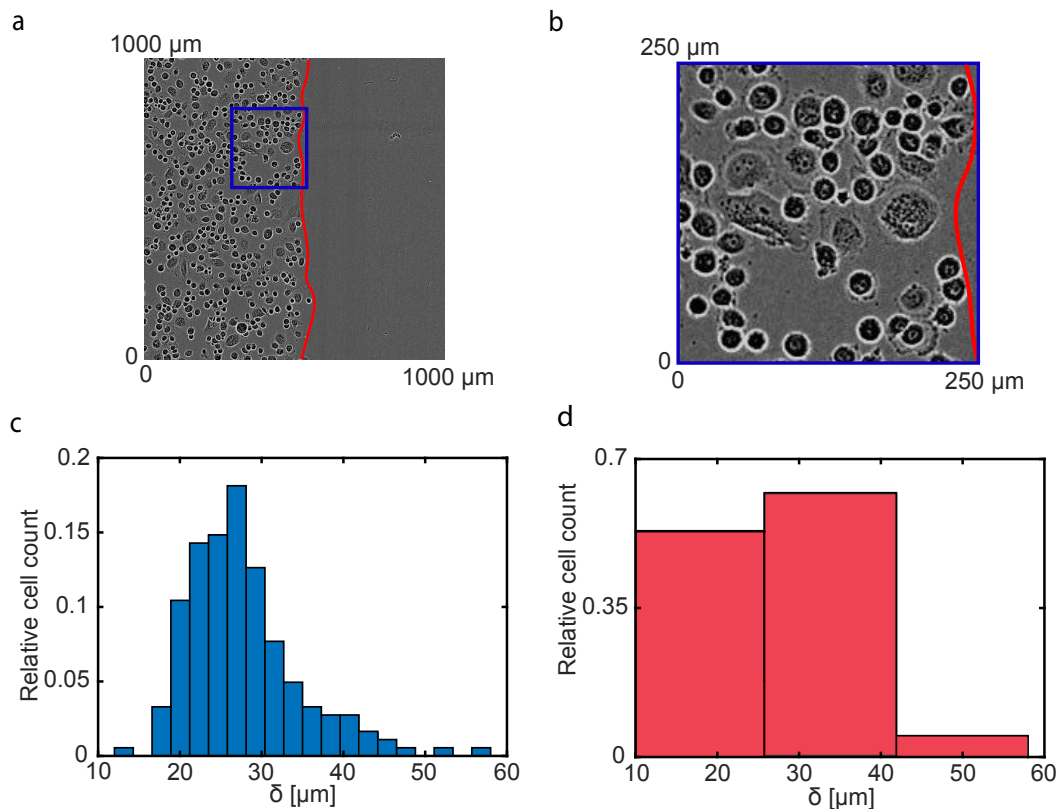

Fig. 1. Heterogeneity in a population of PC-3 prostate cancer cells (Kaighn et al., 1979). (a) Experimental image of an advancing cell population and corresponding cell size distribution. The red solid line denotes position of the leading edge. (b) Detailed image of the subregion denoted in the blue rectangle in Figure 1(a). (c) Cell size distribution with a bin size of  $15 \mu\text{m}$ . The cell size distribution is obtained from the sample of 184 cells randomly selected from the population. (d) Cell size distribution with a bin size of  $2.3 \mu\text{m}$ . The histogram in Figure 1(d) is constructed using the same sample of 184 cells.

27 Although *heterogeneity* in cell populations is frequently observed in experi-  
28 ments, there is relatively little guidance or consensus in the literature about  
29 how to incorporate such heterogeneity into the mathematical models used to  
30 replicate and predict such experiments (An et al., 2001; Altschuler et al., 2010;  
31 Menon et al., 2018). Figure 1(a)-(b) shows a typical experiment where we can  
32 clearly visually observe cells of different sizes. The measured cell size distri-  
33 bution in Figure 1(c) quantifies this heterogeneity in cell sizes and raises the

34 question if the most straightforward approach of applying a single-species ho-  
35 mogeneous model can be reasonably used to predict the spatial spreading of  
36 this clearly heterogeneous population. In addition to the clear visual hetero-  
37 geneity in cell sizes, it could be relevant to consider that cells of different sizes  
38 can exhibit different behaviour such as different rates of motility, or differ-  
39 ent mechanical properties including resistance to deformation and adhesion.  
40 Therefore, it could be possible that there are multiple types of heterogeneity  
41 acting in even this very simple experiment. Previously, heterogeneity in cell  
42 populations has been introduced in both discrete and continuum models of  
43 cell motility (Simpson et al., 2014; Jin et al., 2016b; Sundstrom et al., 2016;  
44 Matsiaka et al., 2017). Previous work has also attempted to estimate parame-  
45 ters in heterogeneous models that describe glioblastoma progression (Rutter et  
46 al., 2018). However, these previous modelling studies do not address the basic  
47 question of identifying whether it is absolutely necessary to apply a multi-  
48 species heterogeneous models to obtain a faithful description of the behaviour  
49 of the heterogeneous population and whether different forms of heterogeneity  
50 affect the answer to this fundamental question.

51 In our work we use an experimentally-motivated approach to investigate the  
52 role of heterogeneity in two-dimensional scratch assays, and we compare the  
53 performance of a single-species homogeneous model relative to a heteroge-  
54 neous multi-species model. We use numerical solutions of the multi-species  
55 heterogeneous model to produce synthetic test data that we use to investigate  
56 the performance of a simpler single-species homogeneous model. To mimic  
57 experimental data, such as depicted in Figure 1, we use the multi-species  
58 continuum approach introduced by Matsiaka et al. (2017). To keep our work  
59 tractable, we describe the heterogeneity by dividing the total population into

60 three subpopulations with varying properties. The choice of working with three  
61 subpopulations allows us to keep the model computationally tractable while  
62 capturing important differences in the population properties, as illustrated  
63 in Figure 1(d). Throughout this work we consider four distinct distributions  
64 of cell sizes: (i) monotonically decreasing (Set Ia); (ii) uniform (Set Ib); (iii)  
65 non-monotonic (Set Ic); and (iv) monotonically increasing (Set Id). The mono-  
66 tonically decreasing distribution, as shown in Figure 3(a), is a fairly accurate  
67 approximation of the experimentally observed cell size distribution in Figure  
68 1(d). The other three kinds of distributions are included in our work for com-  
69 pleteness. Our findings suggest that, for certain cell size distributions, namely  
70 monotonically decreasing and uniform distributions, the single-species homo-  
71 geneous model performs remarkably well with an excellent match between the  
72 density profiles generated by the three-species heterogeneous model and den-  
73 sity profiles predicted by its single-species homogeneous analogue. Therefore,  
74 our results imply that applying a single-species homogeneous model to describe  
75 experiments with monotonically decreasing or uniform cell size distributions  
76 might be sufficient for accurately predicting population-level behaviour. In  
77 contrast, the data with non-monotonic and monotonically increasing cell size  
78 distributions might require the application of multi-species models to account  
79 for differences in population.

80 This manuscript is organised in the following way. In Section 2 we describe  
81 experimental data for a series of two-dimensional scratch assays that clearly  
82 involve a significant level of heterogeneity among the population. In Section 3  
83 we introduce a mathematical model of the cell motility and adhesion. In partic-  
84 ular, we focus on two analogues of the mathematical model: (i) a three-species  
85 heterogeneous model of cell motility where parameters including cell size, cell

86 diffusivity and cell adhesion strength can vary between the subpopulations;  
87 and (ii) a more traditional single-species homogeneous model of cell motility  
88 where all cells in the population are treated as having the same cell size, cell  
89 diffusivity and cell adhesion strength. Results in Section 4 compare perfor-  
90 mance of the single-species homogeneous model as applied to data generated  
91 using the three-species heterogeneous model for different cell size distributions.  
92 Additional results presented in the Supplementary Material explore the role  
93 of: (i) heterogeneity in undirected (diffusive) migration, Set II; and (ii) hetero-  
94 geneity in directed (adhesion/cell-to-cell contacts) migration, Set III. Finally,  
95 in Section 5 we summarise our result and propose potential extensions.

## 96 **2 Experimental data**

97 Monolayer scratch assays are performed using the IncuCyte ZOOM<sup>TM</sup> sys-  
98 tem (Essen BioScience). In all experiments we use the PC-3 prostate cancer  
99 cell line (Kaighn et al., 1979) from the American Type Culture Collection  
100 (ATCC<sup>TM</sup>, Manassas, USA). After growing, cells are removed from the flask  
101 using TrypLE<sup>TM</sup> (ThermoFisher Scientific) in phosphate buffered saline, re-  
102 suspended in growth medium and seeded at a density of 20,000 cells per well in  
103 96-well ImageLock plates (Essen BioScience). The diameter of each individual  
104 well is 9000  $\mu\text{m}$ .

105 Mitomycin-C is added at a concentration of 10  $\mu\text{g}/\text{mL}$  for two hours before a  
106 scratch is made in the monolayer of cells (Sadeghi et al., 1998). Mitomycin-C  
107 is a chemotherapy drug that blocks DNA replication and, consequently, stops  
108 proliferation. As a result of treatment the number of cells in the assay remains  
109 approximately constant since cells neither proliferate or die on the timescale of

110 the experiment. Often scratch assays are performed using mitomycin-C treated  
111 cells so that the experiment focuses only upon the role of cell migration as  
112 opposed to the combined effects of cell migration and cell proliferation. A  
113 WoundMaker<sup>TM</sup> (Essen BioScience) is used to create identical scratches in  
114 the uniformly distributed populations. Medium is aspirated after scratching;  
115 each well is washed twice and refilled with fresh medium (100  $\mu\text{L}$ ). Plates are  
116 incubated in the IncuCyte ZOOM<sup>TM</sup> and photographed every two hours for  
117 48 hours. In total, these experiments are performed in eight of the 96 wells  
118 on the 96-well plate. In our work we use one of the experimental replicates at  
119  $t = 0$  h, shown in Figure 1, to quantify the heterogeneity in a cell population.

120 To quantify the heterogeneity in cell size we randomly select 184 cells from  
121 the experimental image in Figure 1(a) at  $t = 0$  h. Assuming each cell can be  
122 treated as a disc, we estimate the equivalent diameter of each individual cell  
123 using the following approach. First, we use the histogram tool in Photoshop  
124 CS5 to count a number of pixels in the area occupied by each individual cell.  
125 The pixel count is converted to an area,  $A$ . Second, we estimate the equivalent  
126 diameter,  $\delta = \sqrt{4A/\pi}$  and use this data to produce histograms to illustrate  
127 and visualise the variability in cell size within the experiment. The result-  
128 ing cell size distribution, presented as a histogram constructed with bin width  
129  $2.3 \mu\text{m}$ , is shown in Figure 1(c). The bin width  $2.3 \mu\text{m}$  is chosen to demonstrate  
130 the fine structure within the cell population that is not normally incorporated  
131 in mathematical models of cell migration. However, the computational sim-  
132 ulation of a population with the cell size distribution shown in Figure 1(c)  
133 is impractical since it would require significant computational resources to  
134 simulate the dynamics of 17 distinct subpopulations. As a compromise, we  
135 increase the bin width to reduce the number of distinct subpopulations while



136 still retaining a sufficient number of bins to allow us to broadly characterise  
137 the heterogeneity in the population. Figure 1(d) demonstrates the histogram  
138 of cell sizes constructed using the same sample of cells with a larger bin size  
139 width of  $15\ \mu\text{m}$ . Here, we have three subpopulations that capture the key  
140 trends in the heterogeneity in Figure 1(c) without needing to deal with 17  
141 distinct subpopulations.

142 In this work we use experimental data to extract the cell size distribution  
143 at  $t = 0\ \text{h}$  and use this data to generate the initial conditions in the three-  
144 species heterogeneous model (Set Ia, Figure 3). An interesting side effect of  
145 Mitomycin-C pretreatment is that cells increase in size abnormally fast com-  
146 pared to similar experiments without pretreatment (Matsiaka et al., 2018). As  
147 a result of pretreatment, the cell size distribution changes significantly with  
148 time, which, in turn, represents an additional degree of freedom in the prob-  
149 lem. To keep our work tractable, we consider the most fundamental problem  
150 where we treat the cell size distribution as being constant through time, and  
151 we leave an extension to the case where the cell size distribution varies with  
152 time for future analysis.

### 153 **3 Mathematical model**

154 Discrete, stochastic models are often used to describe the spatial spreading of  
155 a population of cells, especially when the population of cells is not too large.  
156 Here, cells move and interact with each other via predefined force function, as  
157 illustrated schematically in Figure 2 (Newman and Grima, 2004; Callaghan et  
158 al., 2006; Hasenauer et al., 2011; Frascoli et al. 2013; Osborne et al., 2017).  
159 This approach is *individual-based* in the sense that knowledge about the move-

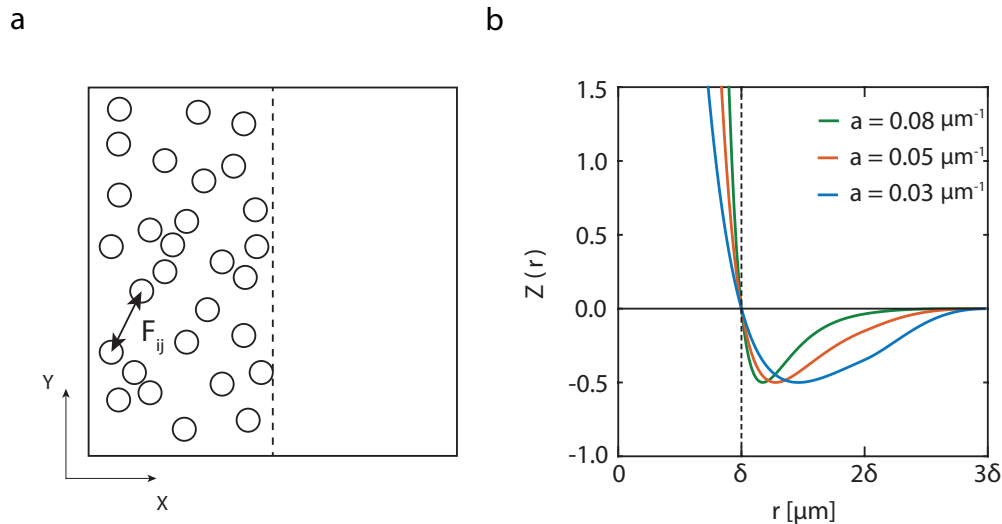

Fig. 2. (a) An idealisation of the front-like distribution of cells in the experimental design shown in Figure 1(a). Here all cells are of constant size.  $F_{ij}$  is the interaction force between cell  $i$  and cell  $j$ . The vertical dashed line represents the approximate leading edge of the population. (b) A typical cell-to-cell interaction force function in the form of the modified Morse potential,  $Z(r)$ , (Equation (3.7)) used to mimic adhesion and repulsion between individual cells. The vertical dashed line represents the diameter of individual agents,  $\delta$ . The horizontal line at  $Z(r) = 0$  shows the change from long-range attraction ( $Z(r) < 0$  for  $r > \delta$ ) to short-range repulsion ( $Z(r) > 0$  for  $r < \delta$ ).

160 ment of each individual is essential to infer the evolution of a density on the  
 161 population-level scale. One of the most popular individual-based modelling  
 162 approaches makes the assumption that the motion of each cell can be de-  
 163 scribed by a Langevin stochastic differential equation (Newman and Grima,  
 164 2004; Middleton et al., 2014). As such, the system of  $N$  cells is described by  
 165 a system of  $N$  stochastic differential equations of the form

$$\frac{d\vec{x}_i}{dt} = \sum_{i \neq j} \vec{F}_{ij} + \vec{\xi}_i, \quad (3.1)$$

166 where  $\vec{x}_i$  is the position vector of the  $i$ th cell,  $\vec{F}_{ij}$  is the interaction force be-  
 167 tween cells  $i$  and  $j$ , and  $\vec{\xi}_i$  is the random stochastic force acting upon cell  $i$   
 168 (Middleton et al., 2014; George et al., 2017; Osborne et al., 2017). The interac-

169 tion force,  $\vec{F}_{ij}$ , can be used to parametrise various features of cell populations,  
170 including heterogeneity. In fact, it is relatively straightforward to model het-  
171 erogeneity in cell sizes in a discrete framework since the interaction force,  $\vec{F}_{ij}$ ,  
172 can be chosen to explicitly include the cell size as a parameter (Matsiaka et al.,  
173 2018). Here we can easily differentiate the population into an arbitrary num-  
174 ber of subpopulations by assigning the value of the cell size to each member of  
175 the population. Despite the many advantages of this kind of individual-based  
176 modelling approach, such individual-based models are computationally inef-  
177 ficient as the number of cells,  $N$ , increases. This is because the computation  
178 time required to simulate such models increases with  $N$ .

179 In contrast, continuum models based on partial differential equations (PDEs)  
180 are much more convenient to model large cell populations because the time  
181 taken to solve continuum PDE models is independent of the size of the pop-  
182 ulation (Sherratt and Murray, 1990; Sheardown and Cheng, 1995; Cai et al.,  
183 2007; Wise et al., 2008). Often, PDE models are derived using continuum-  
184 limit approximations of underlying discrete models and, as such, are able to  
185 retain certain features of a discrete model (Middleton et al., 2014; O’Dea and  
186 King, 2012). In this work we focus on a continuum model that is derived  
187 by taking the limit of a three-species heterogeneous individual-based model  
188 (Matsiaka et al., 2017). This approach allows us to conceptually incorporate  
189 key features of the heterogeneous cell populations into a discrete modelling  
190 framework, and then using a computationally efficient approach to solve the  
191 resulting continuum-limit PDE description of the underlying heterogeneous  
192 model.

193 We note that, due to the geometry of experiments presented in Figure 1, we

194 are interested in the net movement of cells in only one direction, in this case  
 195 the horizontal direction (Jin et al., 2016a). This is due to the fact that the  
 196 net flux of cells in the vertical direction is, on average, zero because of the  
 197 symmetry in the initial conditions of a scratch assay. Consequently, we focus  
 198 on a one-dimensional continuum model and consider the evolution of the total  
 199 cell population in the horizontal direction only. The use of a one-dimensional  
 200 framework to describe two-dimensional scratch assays has been previously  
 201 demonstrated to be a convenient approach to reduce the computational com-  
 202 plexity while still describing the key features of the experiment (Matsiaka et  
 203 al., 2018).

204 Here we employ a mean field model describing the spatial spreading of a pop-  
 205 ulation of cells composed of three distinct subpopulations. In one-dimension,  
 206 the model can be written as

$$\frac{\partial p^{(1)}(x, t)}{\partial t} = D_1 \Delta p^{(1)}(x, t) + \nabla(p^{(1)}(x, t) V^{(1,1)}(x, t)) \quad (3.2)$$

$$- \sum_{i=1}^3 n_i \nabla(p^{(1)}(x, t) V^{(1,i)}(x, t)),$$

$$\frac{\partial p^{(2)}(x, t)}{\partial t} = D_2 \Delta p^{(2)}(x, t) + \nabla(p^{(2)}(x, t) V^{(2,2)}(x, t)) \quad (3.3)$$

$$- \sum_{i=1}^3 n_i \nabla(p^{(2)}(x, t) V^{(2,i)}(x, t)),$$

$$\frac{\partial p^{(3)}(x, t)}{\partial t} = D_3 \Delta p^{(3)}(x, t) + \nabla(p^{(3)}(x, t) V^{(3,3)}(x, t)) \quad (3.4)$$

$$- \sum_{i=1}^3 n_i \nabla(p^{(3)}(x, t) V^{(3,i)}(x, t)),$$

$$V^{(l,i)}(x, t) = \int_{\Omega} F^{(l,i)}(x - y) p^{(i)}(y, t) dy, \quad (3.5)$$

207 where  $p^{(1)}(x, t)$ ,  $p^{(2)}(x, t)$ , and  $p^{(3)}(x, t)$  are the cell densities associated with  
 208 each subpopulation and depend on position  $x$  and time  $t$ . In this heterogeneous

209 model,  $D_1$ ,  $D_2$ , and  $D_3$  are diffusivities of subpopulations 1, 2, and 3,  $n_1$ ,  $n_2$ ,  
210 and  $n_3$  are the numbers of cells in each subpopulation, and  $V^{(l,i)}(x, t)$  is the  
211 velocity field of subpopulation  $l$  induced by subpopulation  $i$  (Matsiaka et al.,  
212 2017). The diffusivity constants parameterise the undirected migration of each  
213 subpopulation and the velocity fields describe the directed migration of each  
214 subpopulation that is driven by a combination of cell-to-cell adhesion and  
215 crowding effects.

216 The interaction force between subpopulations  $l$  and  $i$  that describes directed  
217 migration is given by

$$F^{(l,i)}(x - y) = f_0^{(i)} \mathcal{Z}_i(r) \operatorname{sgn}(x - y), \quad (3.6)$$

218 where  $f_0^{(i)}$  is the dimensional amplitude of the interaction force acting on  
219 subpopulation  $i$ ,  $\mathcal{Z}_i(r)$  is a dimensionless function that parametrises different  
220 features of the cell-to-cell interactions, and  $\operatorname{sgn}$  is the signum function. We  
221 choose to include long-range attraction that models cell-to-cell adhesion, and  
222 a short-range repulsion that reflects volume exclusion effects (Frascoli et al.,  
223 2013; Painter et al., 2010). A number of different phenomenological laws,  $\mathcal{Z}_i(r)$ ,  
224 are used to model repulsive and adhesive intercellular forces (Murray et al.,  
225 2009; Jeon et al., 2010; Middleton et al., 2014). In our work we adopt modified  
226 Morse potential in the form

$$\mathcal{Z}_i(r) = \begin{cases} 2 \left( \exp[-2a(r - \delta_i)] - \exp[-a(r - \delta_i)] \right), & r < 2\delta_i, \\ 2 \left( \exp[-2a(r - \delta_i)] - \exp[-a(r - \delta_i)] \right) g_i(r), & 2\delta_i \leq r \leq 3\delta_i, \\ 0, & r > 3\delta_i, \end{cases} \quad (3.7)$$

227 where  $a$  is the parameter that controls the shape of the force function,  $\delta_i$  is the  
228 cell size in the subpopulation  $i$ ,  $i = 1, 2, 3$ , and  $r = |x - y|$ . We fix the value of  
229 the shape parameter at  $a = 0.08 \mu\text{m}^{-1}$  (Matsiaka et al., 2017). The function  
230  $g_i(r) = \left(1 - \sin \left[ (2\pi r - \pi\delta_i)/2\delta_i \right]\right)/2$  is the Tersoff cut-off function introduced  
231 to impose a finite range of intercellular interactions (Tersoff, 1988). A sketch  
232 of the potential function given by Equation (3.7) for different values of the  
233 parameter  $a$  is shown in Figure 2(b) confirming that this potential function  
234 describes short range repulsion, longer range attraction and no interactions at  
235 over much longer distances. In summary, the key parameters in the hetero-  
236 geneous three-species model are: (i) the cell sizes,  $\delta_1$ ,  $\delta_2$  and  $\delta_3$ ; (ii) the cell  
237 diffusivities,  $D_1$ ,  $D_2$  and  $D_3$ ; and (iii) the amplitudes of interaction forces,  $f_0^{(1)}$ ,  
238  $f_0^{(2)}$  and  $f_0^{(3)}$ . In this work we will systematically explore how heterogeneity  
239 in each of these three key parameters influences whether we need to consider  
240 a complex heterogeneous multi-species model or whether we can describe the  
241 spatial spreading of a cell population using relatively simple homogeneous,  
242 single-species models. Since our experimental data in Figure 1 allows us to  
243 explicitly characterise the heterogeneity in cell size, all results in the main  
244 document focus on cell size. Additional results in the Supplementary Mate-  
245 rial focus on heterogeneity in diffusivity and amplitude of interaction forces  
246 to provide additional insight into the role of heterogeneity in these kinds of  
247 experiments.

248 We define the total density of the heterogeneous population as

$$\mathcal{P}(x, t) = \sum_{i=1}^3 \left[ p^{(i)}(x, t) \right], \quad (3.8)$$

249 where  $p^{(i)}(x, t)$  is the cell density of subpopulation  $i = 1, 2, 3$  predicted by

250 Equations (3.2)-(3.4), and  $\mathcal{P}(x, t)$  is the total cell density. It is important to  
251 interpret the solutions of Equations (3.2)-(3.4) in terms of total cell density  
252 since standard experimental protocols do not normally facilitate the measure-  
253 ment of spatial and temporal distributions of various subpopulations (Cai et  
254 al., 2007; Treloar et al., 2014).

255 We can reduce the three-species heterogeneous system of equations, Equations  
256 (3.2)-(3.4), to obtain a single-species homogeneous model in the form,

$$\frac{\partial P(x, t)}{\partial t} = \bar{D}\Delta P(x, t) - (N - 1)\nabla\left(P(x, t)V(x, t)\right), \quad (3.9)$$

257 where  $P(x, t)$  is the cell density of the total population,  $N = \sum_{i=1}^3 n_i$  is the  
258 total number of cells in the population. Here we assume that the cell size,  
259 diffusivity and strength of the interaction force for each population is constant,  
260 giving  $\delta_i = \bar{\delta}$ ,  $D_i = \bar{D}$ , and  $f_i^{(i)} = \bar{f}_0$  for  $i = 1, 2, 3$ . The key differences  
261 between the homogeneous single-species model, Equation (3.9), and the three-  
262 species heterogeneous model, Equations (3.2)-(3.4) are: (i) the three-species  
263 heterogeneous model incorporates three advection-diffusion equations while  
264 the single-species homogeneous model is given by a single advection-diffusion  
265 equation; (ii) the three-species heterogeneous model contains up to nine free  
266 parameters as opposed to three parameters in the single-species homogeneous  
267 model.

268 The initial conditions in all simulations are chosen to mimic a cell front, such  
269 as that shown in our experimental data set, Figure 1(a). As such, we adopt

270 an initial cell distribution in the form of the one-dimensional step function,

$$P(x, 0) = \mathcal{P}(x, 0) = \begin{cases} 23.9 \times 10^{-3} \text{ cells}/\mu\text{m}, & 0 \mu\text{m} < x < 1000 \mu\text{m}, \\ 0 & \text{cells}/\mu\text{m}, \quad 1000 \mu\text{m} < x < 2000 \mu\text{m}, \end{cases} \quad (3.10)$$

271 on  $0 < x < 2000 \mu\text{m}$ , which is consistent with a length-scale of a typical *in*  
272 *vitro* experiment (Jin et al., 2016a). The initial cell distribution in the hetero-  
273 geneous model is given by the sum of initial densities of three subpopulations,  
274  $\mathcal{P}(x, 0) = \sum_i p^{(i)}(x, 0)$ , where the density of each subpopulation,  $p^{(i)}(x, 0)$ ,  
275 varies between each cell size distribution and can be inferred from the his-  
276 tograms in Figure 3(a). The value of the initial density of the total population  
277 is chosen to represent fairly confluent population of cells. For example, the  
278 simulation of the three-species population with the monotonically decreasing  
279 cell size distribution, Set Ia, is initiated with the confluence level of approx-  
280 imately 65% of maximum packing density, which is fairly typical for scratch  
281 assay experiments (Jin et al., 2016; Matsiaka et al., 2017). We note that the  
282 boundary of the experimental image in Figure 1(a) is not a physical boundary  
283 and cells can freely move across this boundary because the image captures  
284 only a small fraction of a much larger experimental domain (Simpson et al.,  
285 2018). During the experiment, cells freely migrate, in each direction, across  
286 the boundary. However, since the density of cells away from the scratch is  
287 spatially uniform, the net flux of cells across the boundary of the image is  
288 zero. To capture this situation we impose zero net flux boundary conditions  
289 at  $x = 0 \mu\text{m}$  and  $x = 2000 \mu\text{m}$ .

290 All continuum results for single-species homogeneous and three-species het-  
291 erogeneous models, given by Equation (3.9) and Equations (3.2)-(3.4), respec-



292 tively, are solved numerically using the method of lines with  $\Delta x = 4 \mu\text{m}$  and  
293  $\Delta t = 0.005 \text{ h}$  on  $0 < x < 2000 \mu\text{m}$  (Matsiaka et al., 2017). We find that this  
294 choice of spatial and temporal discretisations are sufficiently fine to produce  
295 grid independent results. The detailed discretisation scheme used in this work  
296 is presented in the Supplementary Material.

## 297 4 Results and Discussion

298 To investigate the ability of a single-species homogeneous model to capture  
299 the behaviour of the three-species heterogeneous analogue, we consider a series  
300 of case studies. In these case studies we vary only one parameter at a time to  
301 simplify our analysis and to focus on the impact of each individual parameter.  
302 Another approach would be to use the mathematical models to explore hetero-  
303 geneity multiple parameter at the same time. However, in this first instance,  
304 we prefer to take a more fundamental approach and examine the role of het-  
305 erogeneity in each parameter separately. In the first set of experiments, Set I,  
306 we vary the cell size,  $\bar{\delta}$ , while keeping  $\bar{D}$  and  $\bar{f}_0$  fixed at  $\bar{D} = 250 \mu\text{m}^2/\text{h}$  and  
307  $\bar{f}_0 = 1.0 \mu\text{m}/\text{h}$ . The values of  $D_i$  and  $f_0^{(i)}$  in the heterogeneous three-species  
308 model are fixed at  $D_i = 250 \mu\text{m}^2/\text{h}$  and  $f_0^{(i)} = 1.0 \mu\text{m}/\text{h}$  for  $i = 1, 2, 3$ . These  
309 values of diffusivity and amplitude of cell-to-cell interaction forces are based  
310 on detailed experimental measurements reported previously (Matsiaka et al.,  
311 2019).

312 There are number of ways to quantify performance of the single-species ho-  
313 mogeneous model in our framework. The position of the leading edge of the  
314 spreading population is routinely used by experimentalists to provide quanti-  
315 tative insights into the rate of spatial spreading of a cell population (Treloar

316 and Simpson, 2013; Johnston et al., 2014; Kollimada et al., 2016; Nardini  
317 et al., 2016; Bobadilla et al., 2019). Therefore, we quantify the discrepancy  
318 between the solution of the heterogeneous three-species model and the homo-  
319 geneous single-species model using an error measure,  $E(\bar{\delta})$ , associated with  
320 the position of the leading edge,

$$E(\bar{\delta}) = \frac{1}{\alpha} \sum_j \left[ \mathcal{S}(t_j) - S(t_j) \right]^2, \quad (4.1)$$

321 where  $\mathcal{S}(t_j)$  is the position of the leading edge according to the three-species  
322 heterogeneous model at time  $t_j$ ,  $S(t_j)$  is the position of the leading edge pre-  
323 dicted by the single-species homogeneous model, and  $\alpha = 49$  is the number of  
324 discrete time points we use to compute  $E(\bar{\delta})$ . In both scenarios the position of  
325 the leading edge is computed as the coordinate on the one-dimensional domain  
326 where the density is 1% of the initial density (Treloar and Simpson, 2013). An  
327 alternative approach is to use an error measure based on the discrepancy be-  
328 tween cell density profiles. At first, this approach of using the entire cell density  
329 profile might be thought to be preferable to working with leading edge data  
330 since density profiles incorporate much more detailed spatial information than  
331 just using the position of the leading edge. However, extracting the density  
332 data from experiments is much more tedious because it often involves manual  
333 cell counting in regions where cell densities are high and this is both difficult  
334 to reproduce and very time consuming (Treloar et al. 2014). Therefore, to keep  
335 our work as practical as possible, here we present only results with an error  
336 measure solely based on the leading edge data. Additional result that measure  
337 the discrepancy between the models using the entire density information are  
338 presented in the Supplementary Material (Figure A.1 and Figure A.2), and  
339 we find that this more complicated approach gives very similar results to the

340 leading edge data. Therefore, in this work, we focus on the using leading edge  
341 data.

342 The experimental distribution of cell sizes in Figure 1(d) provides insights into  
343 potential choices of the cell size distribution in Equations (3.2)-(3.4). Here we  
344 define three subpopulations based on the equivalent cell size: small ( $\delta_1 = 18$   
345  $\mu\text{m}$ ), medium ( $\delta_2 = 34 \mu\text{m}$ ), and large cells ( $\delta_3 = 50 \mu\text{m}$ ). For simplicity, we  
346 set the fractions of small and medium cells to be equal and refer to this distri-  
347 bution as a monotonically decreasing distribution of cell sizes (Set Ia, Figure  
348 3). After considering the experimentally-motivated monotonically decreasing  
349 distribution, we then systematically explore: (i) uniform (Set Ib, Figure 4),  
350 (ii) non-monotonic (Set Ic, Figure 5), and (iii) monotonically increasing dis-  
351 tributions (Set Id, Figure 6).

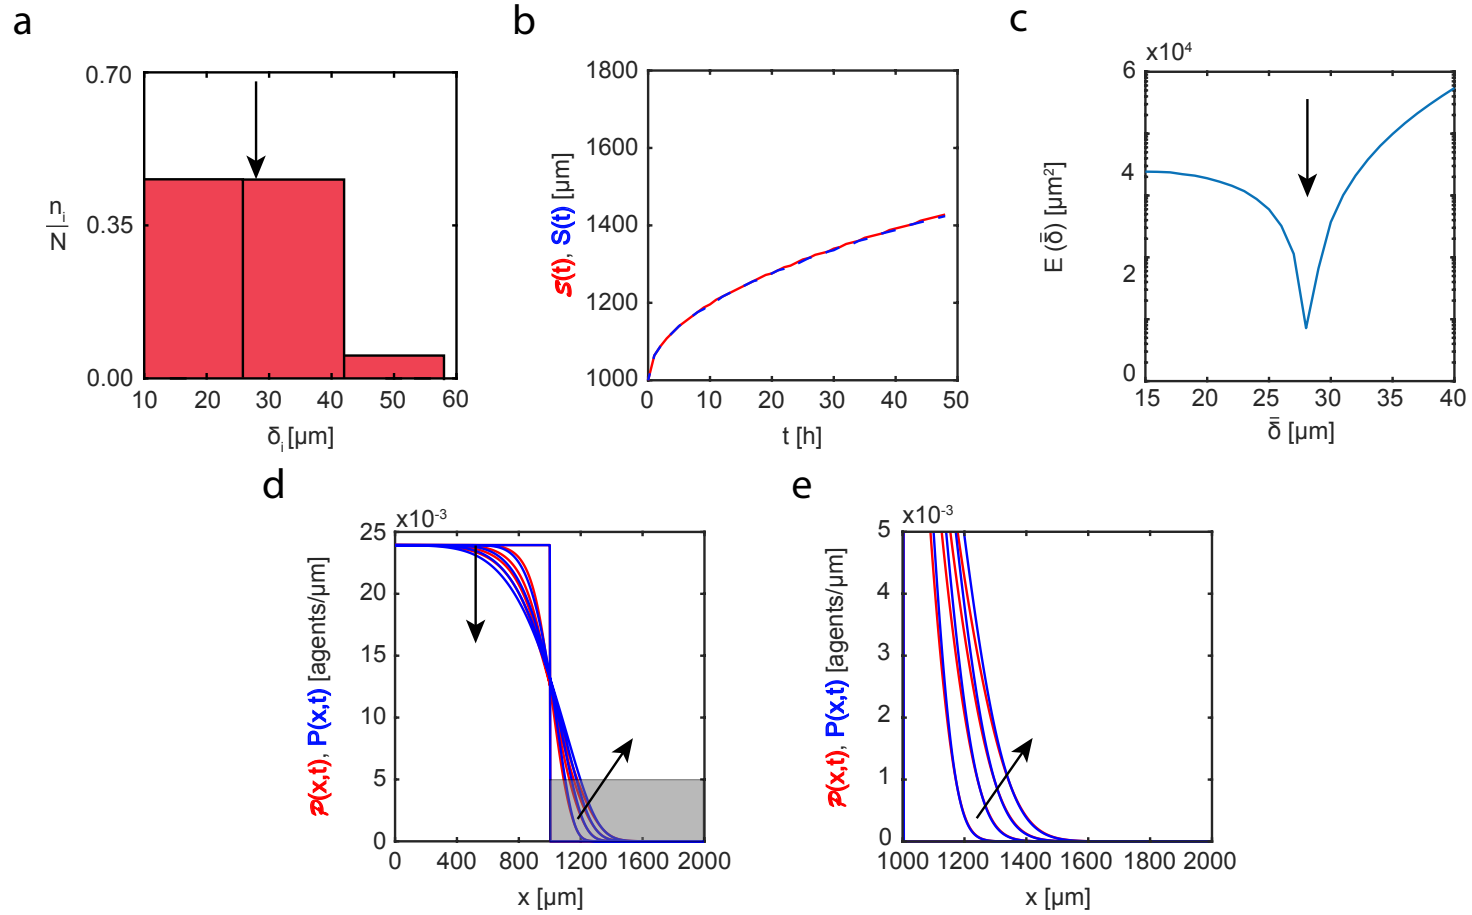

Fig. 3. Set Ia. Heterogeneity in cell sizes: monotonically decreasing distribution. (a) Cell size distribution adopted in the three-species heterogeneous model, Equations (3.2)-(3.4). Here the proportions of cells of different sizes are set to: (i)  $n_1/N = 0.472$ ; (ii)  $n_2/N = 0.472$ ; (iii)  $n_3/N = 0.056$ . (b) Leading edge as predicted by the three-species heterogeneous model,  $S(t)$  (solid red), and the best-fit approximation given by the single-species homogeneous model,  $S(t)$  (blue dashed). (c) Error measure,  $E(\bar{\delta})$ , between the position of the leading edge given by the three-species heterogeneous model and the position predicted by the single-species homogeneous model as a function of cell size,  $\bar{\delta}$ . The black arrow denotes the best-fit value of cell size,  $\bar{\delta} = 28 \mu\text{m}$ . (d)-(e) Cell density profiles predicted by the three-species heterogeneous model,  $P(x,t)$  (solid red), superimposed with density profiles given by the single-species homogeneous model calibrated with the best-fit value of  $\delta$ ,  $P(x,t)$  (solid blue). The continuum results for both models are presented at  $t = 0, 12, 24, 36,$  and  $48$  h. Black arrows denote the direction of increasing time. Results in (e) show a close-up comparison right near the leading edge, denoted by the gray shaded region in (d).

352 Figure 3(b) compares the leading edge prediction,  $\mathcal{S}(t)$ , given by the three-  
353 species heterogeneous model with the associated best-fit match,  $S(t)$ , pre-  
354 dicted by the single-species homogeneous model. Our systematic computation  
355 of the error measure,  $E(\bar{\delta})$ , demonstrates a clear minimum which ensures the  
356 unique choice of a best-fit cell size,  $\bar{\delta}$ . Results in Figure 3(d) superimposes  
357 the solution of the three-species heterogeneous model with the solution of the  
358 single-species homogeneous model parameterised with the best fit cell size.  
359 Comparing the time evolution of the spreading density profiles in Figure 3(d)  
360 (with additional details at the leading edge shown in the magnified region in  
361 Figure 3(e)) we see that the appropriately parameterised single-species homo-  
362 geneous model captures the temporal evolution of the spreading profile given  
363 by the heterogeneous model remarkably accurately. In particular, the den-  
364 sity profiles predicted by the single-species homogeneous model match both  
365 the position and shape of the density profiles generated by the three-species  
366 heterogeneous model. These results imply that in this case it would be rea-  
367 sonable to use a much simpler single-species homogeneous model to describe  
368 and predict this spatial spreading.

369 Visual inspection of the results in Figures 3 - 6 suggests that we can always  
370 find a unique, well-defined value of the cell size in the single-species homo-  
371 geneous model to provide an accurate prediction of the temporal evolution  
372 of the position of a leading edge of the spreading heterogeneous cell popu-  
373 lations regardless of the underlying cell size distribution in the three-species  
374 heterogeneous model (Figures 3(b)-6(b)). In contrast, the quality of match  
375 between the shape of the density profiles for the three-species heterogeneous  
376 model and the single-species homogeneous model varies significantly between  
377 different cell size distributions. For example, the experimentally motivated dis-

378 tribution in Figure 3(a) (Set Ia) leads to a remarkably good match between the  
379 three-species heterogeneous model and the single-species homogeneous model.  
380 Similarly, the uniform distribution shown in Figure 4(a) (Set Ib) also leads to  
381 a reasonably good quality of match between two different models. In contrast,  
382 the density profiles associated with the non-monotonic cell size distribution  
383 (Figure 5, Set Ic) and monotonically increasing cell size distribution (Figure  
384 6, Set Id) show a relatively poor match. In these cases, it would seem prudent  
385 not to use a simpler single-species homogeneous model to simulate and predict  
386 these experiments.

387 The values of the cell size,  $\bar{\delta}$ , that produce best match between the single-  
388 species homogeneous and three-species heterogeneous models vary significantly  
389 between different cell size distributions. For example, the best-fit value of the  
390 cell size for the uniform distribution (Figure 4, Set Ib),  $\bar{\delta} = 36 \mu\text{m}$ , is quite  
391 close to the weighted average value of  $34 \mu\text{m}$  for the distribution in Figure  
392 4(a). This indicates that the choice of a simple weighted average of the cell  
393 sizes might be a reasonable way to parameterise the single-species homo-  
394 geneous model if the experimentally observed distribution is close to uniform.  
395 We observe similar agreement for best-fit values of the cell size in the case of  
396 monotonically decreasing (Set Ia) and monotonically increasing (Set Id) cell  
397 size distributions, shown in Figure 3 and Figure 6, respectively. In contrast,  
398 the best-fit value of the cell size for the non-monotonic distribution (Set Ic),  
399  $\bar{\delta} = 40 \mu\text{m}$ , differs significantly from the weighted average of  $34 \mu\text{m}$ . Therefore,  
400 these results suggest that great care ought to be exercised when taking a dis-  
401 tribution of parameter values and attempting to select the most appropriate  
402 single representative value of that parameter.

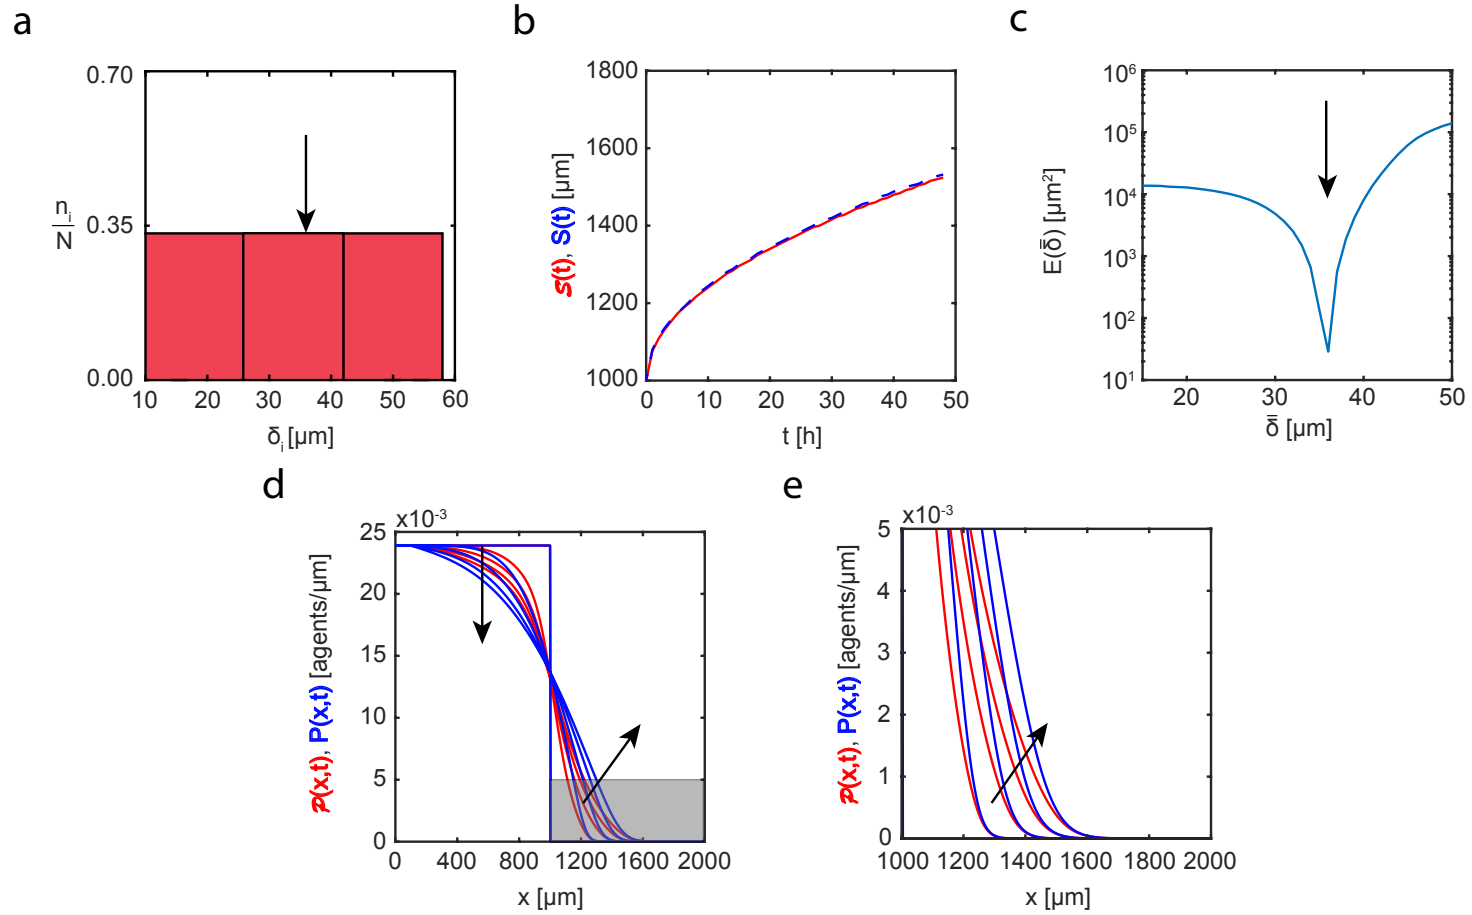

Fig. 4. Set Ib. Heterogeneity in cell sizes: uniform distribution. (a) Cell size distribution adopted in the three-species heterogeneous model, Equations (3.2)-(3.4). Here the proportions of cells of different sizes are set to: (i)  $n_1/N = 0.33(3)$ ; (ii)  $n_2/N = 0.33(3)$ ; (iii)  $n_3/N = 0.33(3)$ . (b) Leading edge as predicted by the three-species heterogeneous model,  $\mathcal{S}(t)$  (solid red), and the best-fit approximation given by the single-species homogeneous model,  $S(t)$  (blue dashed). (c) Error measure,  $E(\bar{\delta})$ , between the position of the leading edge given by the three-species heterogeneous model and the position predicted by the single-species homogeneous model as a function of cell size,  $\bar{\delta}$ . The black arrow denotes the best-fit value of cell size,  $\bar{\delta} = 36 \mu\text{m}$ . (d)-(e) Cell density profiles predicted by the three-species heterogeneous model,  $\mathcal{P}(x,t)$  (solid red), superimposed with density profiles given by the single-species homogeneous model calibrated with the best-fit value of  $\bar{\delta}$ ,  $P(x,t)$  (solid blue). The continuum results for both models are presented at  $t = 0, 12, 24, 36,$  and  $48$  h. Black arrows denote the direction of increasing time. Results in (e) show a close-up comparison right near the leading edge, denoted by the gray shaded region in (d).

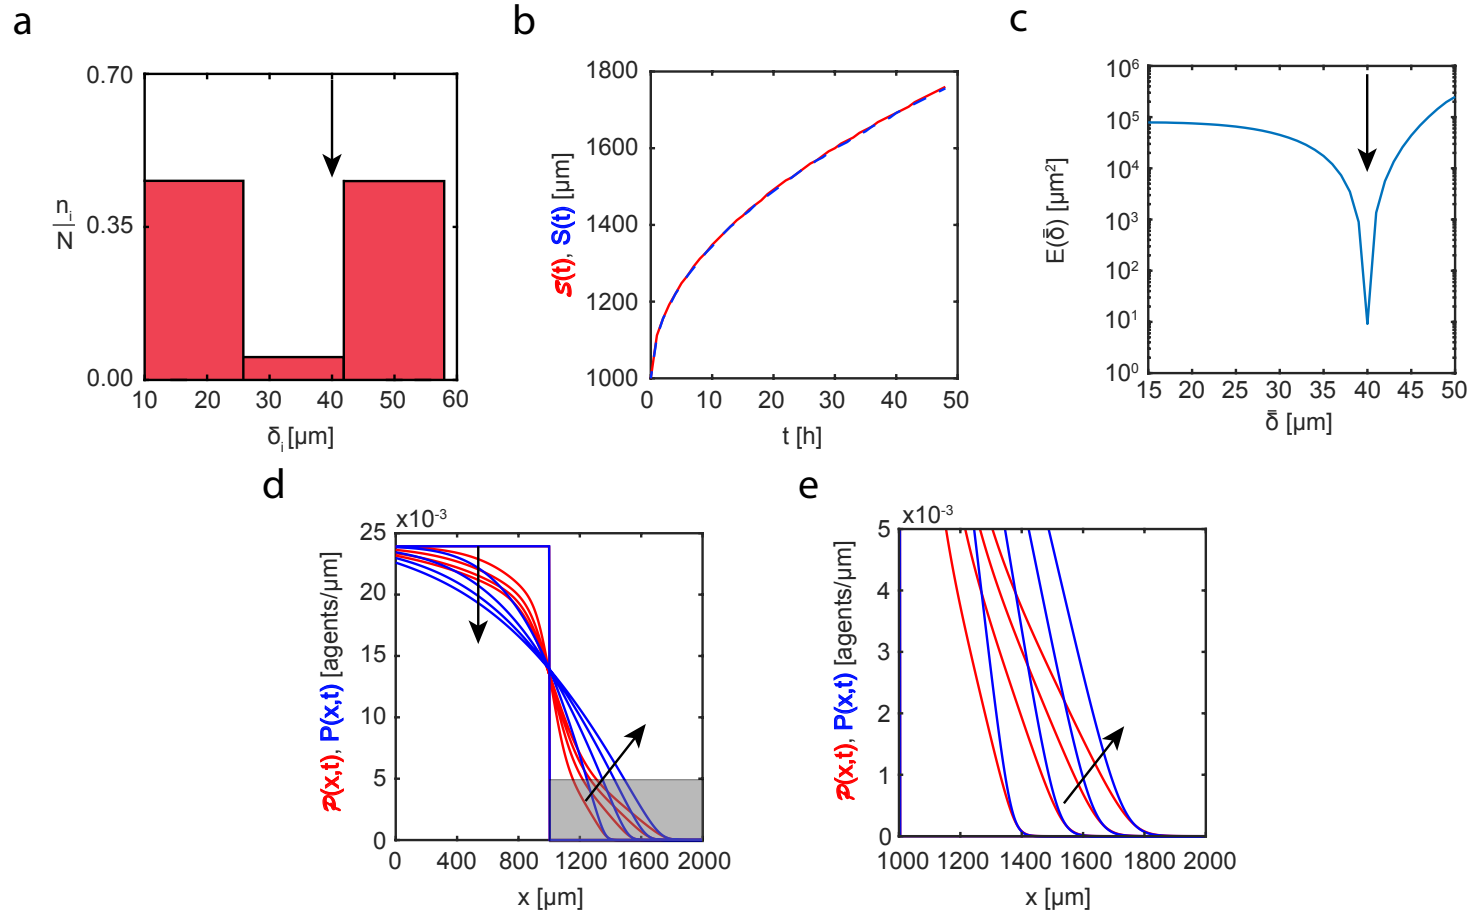

Fig. 5. Set Ic. Heterogeneity in cell sizes: non-monotonic distribution. (a) Cell size distribution adopted in the three-species heterogeneous model, Equations (3.2)-(3.4). Here the proportions of cells of different sizes are set to: (i)  $n_1/N = 0.472$ ; (ii)  $n_2/N = 0.056$ ; (iii)  $n_3/N = 0.472$ . (b) Leading edge as predicted by the three-species heterogeneous model,  $\mathcal{S}(t)$  (solid red), and the best-fit approximation given by the single-species homogeneous model,  $S(t)$  (blue dashed). (c) Error measure,  $E(\bar{\delta})$ , between the position of the leading edge given by the three-species heterogeneous model and the position predicted by the single-species homogeneous model as a function of cell size,  $\bar{\delta}$ . The black arrow denotes the best-fit value of cell size,  $\bar{\delta} = 40 \mu\text{m}$ . (d)-(e) Cell density profiles predicted by the three-species heterogeneous model,  $\mathcal{P}(x,t)$  (solid red), superimposed with density profiles given by the single-species homogeneous model calibrated with the best-fit value of  $\bar{\delta}$ ,  $P(x,t)$  (solid blue). The continuum results for both models are presented at  $t = 0, 12, 24, 36,$  and  $48$  h. Black arrows denote the direction of increasing time. Results in (e) show a close-up comparison right near the leading edge, denoted by the gray shaded region in (d).



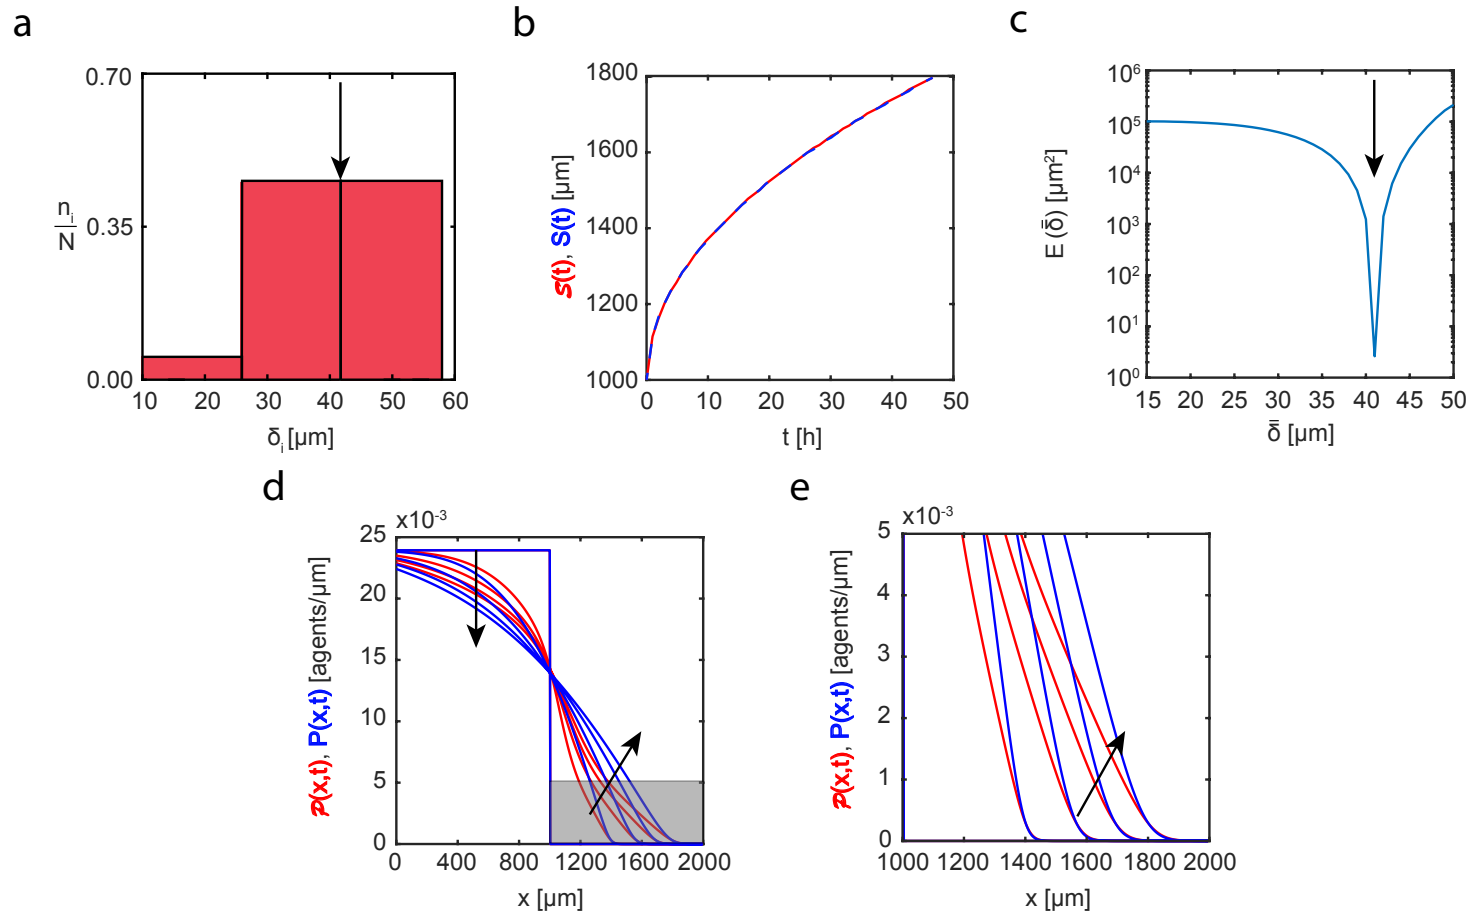

Fig. 6. Set Id. Heterogeneity in cell sizes: monotonically increasing distribution. (a) Cell size distribution adopted in the three-species heterogeneous model, Equations (3.2)-(3.4). Here the proportions of cells of different sizes are set to: (i)  $n_1/N = 0.056$ ; (ii)  $n_2/N = 0.472$ ; (iii)  $n_3/N = 0.472$ . (b) Leading edge as predicted by the three-species heterogeneous model,  $S(t)$  (solid red), and the best-fit approximation given by the single-species homogeneous model,  $S(t)$  (blue dashed). (c) Error measure,  $E(\bar{\delta})$ , between the position of the leading edge given by the three-species heterogeneous model and the position predicted by the single-species homogeneous model as a function of cell size,  $\bar{\delta}$ . The black arrow denotes the best-fit value of cell size,  $\bar{\delta} = 41 \mu\text{m}$ . (d)-(e) Cell density profiles predicted by the three-species heterogeneous model,  $P(x,t)$  (solid red), superimposed with density profiles given by the single-species homogeneous model calibrated with the best-fit value of  $\bar{\delta}$ ,  $P(x,t)$  (solid blue). The continuum results for both models are presented at  $t = 0, 12, 24, 36,$  and  $48$  h. Black arrows denote the direction of increasing time. Results in (e) show a close-up comparison right near the leading edge, denoted by the gray shaded region in (d).

403 In addition to the results in Figures 3 - 6 exploring the role of heterogeneity  
404 in cell size, we present an additional suite of results where we systematically  
405 explore the role of heterogeneity in diffusivity (Set II) and amplitude of interac-  
406 tion forces (Set III) while keeping the cell size constant in all subpopulations.  
407 These additional results are presented in the Supplementary Material doc-  
408 ument. Both Set II and Set III data sets demonstrate exceptional quality of  
409 match between the three-species heterogeneous simulation data and its best-fit  
410 single-species homogeneous equivalent. Again, these additional results provide  
411 guidance about when it is reasonable to approximate a more complicated het-  
412 erogeneous mathematical model with a simpler single-species homogeneous  
413 model.

## 414 **5 Conclusions**

415 In this work, we explore the role of heterogeneity in the context of study-  
416 ing how an initially confined population of cells can spread into surround-  
417 ing initially unoccupied regions, as in the case of a scratch assay. We use  
418 a three-species heterogeneous model of cell motility, account for undirected  
419 cell motility, short range repulsion (crowding) and longer range adhesion, to  
420 capture experimentally observed heterogeneity in cell sizes from a new exper-  
421 imental data set from a two-dimensional scratch assay as shown in Figure 1.  
422 Our continuum models account for the undirected random motility, cell-to-cell  
423 adhesion, and cell crowding. The single-species homogeneous model is applied  
424 to each set of three-species heterogeneous simulation data in an attempt to  
425 match cell density profiles.

426 To analyse the performance of the single-species homogeneous model to cap-

427 ture data from our three-species heterogeneous model we consider four dif-  
428 ferent cell size distributions: (i) monotonically decreasing distribution, (ii)  
429 uniform distribution, (iii) non-monotonic distribution, and (iv) monotonically  
430 increasing distribution. Overall, for a set of experimentally-motivated parame-  
431 ter combinations, we find that the standard single-species homogeneous model  
432 is able to accurately predict the position of the leading edge for all case stud-  
433 ies presented. However, the quality of the match between the shape of the  
434 density profiles varies significantly depending on the details of the form of  
435 the heterogeneity present. For example, the monotonically decreasing distri-  
436 bution (Set Ia) demonstrates remarkable goodness of fit between the two sets  
437 of density profiles, as shown in Figure 3(d). This result is important because  
438 the monotonically decreasing cell size distribution is chosen to mimic the dis-  
439 tribution of the cell sizes observed in our new experimental data set, shown  
440 in Figure 1. Similarly, the homogeneous distribution, Figure 4, shows that  
441 single-species homogeneous model is able to accurately replicate the three-  
442 species heterogeneous model results. This is an expected result because in this  
443 special case the cells of each subpopulation are the same size. In contrast,  
444 the single-species homogeneous model does not perform so well when applied  
445 to both non-monotonic and monotonically increasing distributions in Figures  
446 5-6, respectively. Additionally we explore potential heterogeneity in diffusiv-  
447 ity and amplitude of the cell-to-cell interactions (Supplementary Material).  
448 Overall, our results suggest that for certain cell size distributions, a simple  
449 and computationally efficient single-species homogeneous model is preferable  
450 over a three-species heterogeneous model.

451 There are number of ways this work can be extended which we leave for future  
452 analysis. All our simulations and analysis focus on treating the heterogeneity

453 in the population of cells by considering the total population to be composed of  
454 three distinct subpopulations. For more extreme forms for heterogeneity, such  
455 as multi-modal distributions, the results presented in this work could be ex-  
456 tended by considering additional subpopulations. Another simplification that  
457 we invoke is to assume that the measured heterogeneity remains constant for  
458 the duration of the experiment. Future studies could address the significantly  
459 more complicated question of allowing the distributions to evolve in time on  
460 the same time scale as the experiment to see if it is still possible to use a sim-  
461 pler homogeneous model in this more complicated scenario. Another avenue  
462 for further exploration would be to consider heterogeneity in more than one  
463 parameter at a time, whereas in this work we have taken the most fundamental  
464 approach and examined heterogeneity in just one parameter in isolation from  
465 the others. For both of these extensions, the modelling framework presented  
466 in this study can be extended to explore these additional features, and we  
467 leave such extensions for future consideration. Another option for extending  
468 the work would be to consider further details in the mathematical models,  
469 such as the effects of combined cell migration and combined cell proliferation.  
470 Here we have not pursued this approach because our experimental data set  
471 has been carefully prepared to exclude the effects of proliferation so that we  
472 can focus just on cell migration and heterogeneity in cell migration alone.

## 473 **Acknowledgements**

474 This work is supported by the Australian Research Council (DP170100474).  
475 Computational resources are provided by the High Performance Computing  
476 and Research Support Group at QUT. REB is a Royal Society Wolfson Re-

477 search Merit Award holder, would like to thank the Leverhulme Trust for a  
478 Research Fellowship and also acknowledges the BBSRC for funding via grant  
479 no. BB/R000816/1. We appreciate helpful comments provided by two anony-  
480 mous referees.

481 **References**

- 482 [1] Altschuler, S.J., Wu, L.F., 2010. Cellular heterogeneity: when do differences make  
483 a difference? *Cell* 141(4), 559-563.
- 484 [2] An, F.-Q., Matsuda, M., Fujii, H., Tang, R.-F., Amemiya, H., Dai, Y.-M.,  
485 Matsumoto Y., 2001. Tumor heterogeneity in small hepatocellular carcinoma:  
486 Analysis of tumor cell proliferation, expression and mutation of p53 and  $\beta$ -  
487 Catenin. *International Journal of Cancer* 93, 468-474.
- 488 [3] Baker, R.E., Simpson, M.J., 2010. Correcting mean-field approximations for  
489 birth-death-movement processes. *Physical Review E* 82, 041905.
- 490 [4] Binder, B.J., Simpson, M.J., 2016. Cell density and cell size dynamics during  
491 *in vitro* tissue growth experiments: Implications for mathematical models of  
492 collective cell behaviour. *Applied Mathematical Modelling* 40, 3438-3446.
- 493 [5] Bobadilla, A.V.P., Arevalo, J., Sarro, E., Byrne, H.M., Maini, P.K., Carraro, T.,  
494 Balocco, S., Meseguer, A., Alarcon, T., 2019. In vitro cell migration quantification  
495 method for scratch assays. *Journal of the Royal Society Interface* 16, 20180709.
- 496 [6] Cai, A.Q., Landman, K.A., Hughes, B.D., 2007. Multi-scale modeling of a wound-  
497 healing cell migration assay. *Journal of Theoretical Biology* 245(3), 576-594.
- 498 [7] Callaghan, T., Khain, E., Sander, L.M., Ziff, R.M., 2006. A stochastic model for  
499 wound healing. *Journal of Statistical Physics* 122(5), 909-924.
- 500 [8] Edmondson, R., Broglie, J.J., Adcock, A.F., Yang, L., 2014. Three-dimensional  
501 cell culture systems and their applications in drug discovery and cell-based  
502 biosensors. *ASSAY and Drug Development Technologies* 12(4), 207-218.
- 503 [9] Essen BioScience: IncuCyte ZOOM live cell imaging.  
504 Available from: <http://www.essenbioscience.com/essen-products/incucyte/>  
505 (Accessed: August 2019).

- 506 [10] Frascoli, F., Hughes, B.D., Zaman, M.H., Landman, K.A., 2013. A  
507 computational model for collective cellular motion in three dimensions: General  
508 framework and case study for cell pair dynamics. PLoS ONE 8(3), e59249.
- 509 [11] Galle, J., Loeffler, M., Drasdo D., 2005. Modeling the effect of deregulated  
510 proliferation and apoptosis on the growth dynamics of epithelial cell populations  
511 *in vitro*. Biophysical Journal 88, 62-75.
- 512 [12] Gerlee, P., 2013. The model muddle: In search of tumor growth laws. Cancer  
513 Research 73(8), 2407-2411.
- 514 [13] George, M., Bullo F., Campas O., 2017. Connecting individual to collective cell  
515 migration. Scientific Reports 7, 9720.
- 516 [14] Hasenauer, J., Waldherr, S., Doszczak, M., Scheurich, P., Radde, N., Allgwer,  
517 F. 2011. Analysis of heterogeneous cell populations: A density-based modeling  
518 and identification framework. Journal of Process Control 21, 1417-1425.
- 519 [15] Jeon J, Quaranta V, Cummings PT (2010). An off-lattice hybrid discrete-  
520 continuum model of tumor growth and invasion. Biophysical Journal 98 (1): 37-47.
- 521 [16] Jin, W., Shah, E.T., Penington, C.J., McCue, S.W., Chopin, L.K., Simpson,  
522 M.J., 2016. Reproducibility of scratch assays is affected by the initial degree of  
523 confluence: Experiments, modelling and model selection. Journal of Theoretical  
524 Biology 390, 136-145.
- 525 [17] Jin, W., McCue, S.W., Simpson, M.J., 2018. Extended logistic growth model  
526 for heterogeneous populations. Journal of Theoretical Biology 445, 51-61.
- 527 [18] Johnston, S.T., Simpson, M.J., McElwain, D.L.S., 2014. How much information  
528 can be obtained from tracking the position of the leading edge in a scratch assay?  
529 Journal of the Royal Society Interface 11, 20140325.
- 530 [19] Kaighn, M.E., Narayan, K.S., Ohnuki, Y., Lechner, J.F., Jones, L.W., 1979.

- 531 Establishment and characterization of a human prostatic carcinoma cell line (PC-  
532 3). *Investigative urology* 17(1), 16-23.
- 533 [20] Kollimada, S.A., Kulkarni, A.H., Ravan, A., Gundiah, N., 2016. Advancing edge  
534 speeds of epithelial monolayers depend on their initial confining geometry. *PLoS*  
535 *ONE* 11(4), e0153471.
- 536 [21] Maini, P.K., McElwain, D.L.S., Leavesley, D., 2004. Travelling waves in a wound  
537 healing assay. *Applied Mathematics Letters* 17(5), 575-580.
- 538 [22] Maini, P.K., McElwain, D.L.S., Leavesley, D., 2004. Traveling wave model to  
539 interpret a wound-healing cell migration assay for human peritoneal mesothelial  
540 cells. *Tissue Engineering* 10(3/4), 475-482.
- 541 [23] Matsiaka, O.M., Penington, C.J., Baker, R.E., Simpson, M.J., 2017. Continuum  
542 approximations for lattice-free multi-species models of collective cell migration.  
543 *Journal of Theoretical Biology* 422, 1-11.
- 544 [24] Matsiaka, O.M., Penington, C.J., Baker, R.E., Simpson, M.J., 2018. Discrete  
545 and continuum approximations for collective cell migration in a scratch assay with  
546 cell size dynamics. *Bulletin of Mathematical Biology* 80(4), 738-757.
- 547 [25] Matsiaka, O.M., Baker, R.E., Simpson, M.J., 2019. Mechanistic and  
548 experimental models of cell migration reveal the importance of intercellular  
549 interactions in cell invasion. *Biomedical Physics and Engineering Express* 5,  
550 045009.
- 551 [26] Menon, T., Kumar, R., Nair, S., 2018. Cell size heterogeneity early in  
552 development is required for collective cell migration during gastrulation in  
553 zebrafish. *bioRxiv* doi:10.1101/481325.
- 554 [27] Middleton, A.M., Fleck, C., Grima, R., 2014. A continuum approximation to  
555 an off-lattice individual-cell based model of cell migration and adhesion. *Journal*  
556 *of Theoretical Biology* 359, 220-232.



- 557 [28] Murray, P.J., Edwards, C.M., Tindall, M.J., Maini, P.K., 2009. From a discrete  
558 to a continuum model of cell dynamics in one dimension. *Physical Review E* 80(3),  
559 031912.
- 560 [29] Nardini, J.T., Chapnick, D.A., Liu, X., Bortz, D.M., 2016 Modeling keratinocyte  
561 wound healing dynamics: Cell-cell adhesion promotes sustained collective  
562 migration. *Journal of Theoretical Biology* 400, 103-117.
- 563 [30] Newman, T.J., Grima, R., 2004. Many-body theory of chemotactic cell-cell  
564 interactions. *Physical Review E* 70, 051916.
- 565 [31] O’Dea, R.D., King, J.R., 2012. Continuum limits of pattern formation in  
566 hexagonal-cell monolayers. *Journal of Mathematical Biology* 64, 579-610.
- 567 [32] Osborne, J.M., Fletcher, A.G., Pitt-Francis, J.M., Maini, P.K., Gavaghan, D.J.,  
568 2017. Comparing individual-based approaches to modelling the self-organization  
569 of multicellular tissues. *PLOS Computational Biology* 13(2), e1005387.
- 570 [33] Painter, K.J., Sherratt, J.A., 2003. Modelling the movement of interacting cell  
571 populations. *Journal of Theoretical Biology* 225(3), 327-339.
- 572 [34] Painter, K.J., Armstrong, N.J., Sherratt, J.A., 2010. The impact of adhesion  
573 on cellular invasion processes in cancer and development. *Journal of Theoretical*  
574 *Biology* 264, 1057-1067.
- 575 [35] Pozzobon, V., Perre, P., 2018. Han’s model parameters for microalgae grown  
576 under intermittent illumination: Determined using particle swarm optimization.  
577 *Journal of Theoretical Biology* 437, 29-35.
- 578 [36] Rutter, E.M., Banks, H.T., Flores, K.B., 2018. Estimating intratumoral  
579 heterogeneity from spatiotemporal data. *Journal of Mathematical Biology* 77:  
580 1999-2022.
- 581 [37] Sadeghi, H.M., Seitz, B., Hayashi, S., LaBree, L., McDonnell, P.J., 1998. In

- 582 vitro effects of Mitomycin-C on human keratocytes. *Journal of Refractive Surgery*  
583 14, 534-40.
- 584 [38] Sarapata, E.A., de Pillis, L.G., 2010. A comparison and catalog of intrinsic  
585 tumor growth models. *Bulletin of Mathematical Biology* 76, 2010-2024.
- 586 [39] Savla, U., Olson, L.E., Waters, C.M., 2004. Mathematical modeling of airway  
587 epithelial wound closure during cyclic mechanical strain. *Journal of Applied*  
588 *Physiology* 96, 566-574.
- 589 [40] Sengers, B.A., Please, C.P., Oreffo, R.O.C., 2007. Experimental characterization  
590 and computational modelling of two-dimensional cell spreading for skeletal  
591 regeneration. *Journal of the Royal Society Interface* 4, 1107-1117.
- 592 [41] Sepulveda, N., Petitjean, L., Cochet, O., Grasland-Mongrain, E., Silberzan, P.,  
593 Hakim, V., 2016. Collective cell motion in an epithelial sheet can be quantitatively  
594 described by a stochastic interacting particle model. *PLOS Computational Biology*  
595 9(3), e1002944
- 596 [42] Shah, E.T., Upadhyaya, A., Philp, L.K., Tang, T., Skalamera, D., Gunter,  
597 J., Nelson, C.C., Williams, E.D., Hollier, B.G., 2016. Repositioning “old” drugs  
598 for new causes: identifying new inhibitors of prostate cancer cell migration and  
599 invasion. *Clinical & Experimental Metastasis* 33, 385-399.
- 600 [43] Sheardown, H., Cheng, Y.-L., 1995. Mechanisms of corneal epithelial wound  
601 healing. *Chemical Engineering Science* 51(19), 4517-4529.
- 602 [44] Sherratt, J.A., Murray, J.D., 1990. Models of epidermal wound healing.  
603 *Proceedings of the Royal Society B* 241, 29-36.
- 604 [45] Sundstrom, A., Bar-Sagi, D., Mishra, B., 2016. Simulating heterogeneous tumor  
605 cell populations. *PLoS ONE* 11(12), e0168984.
- 606 [46] Simpson, M.J., Treloar, K.K., Binder, B.J., Haridas, P., Manton, K.J.,  
607 Leavesley, D.I., McElwain, D.L.S., Baker, R.E., 2013. Quantifying the roles of

608 cell motility and cell proliferation in a circular barrier assay. *Journal of the Royal*  
609 *Society Interface* 10, 20130007.

610 [47] Simpson, M.J., Haridas P., McElwain D.L.S., 2014. Do pioneer cells exist? *PLoS*  
611 *ONE* 9(1), e85488.

612 [48] Simpson M.J., Jin, W., Vittadello, S.T., Tambyah, T.A., Ryan, J.M.,  
613 Gunasingh, G., Haass, N.K., McCue, S.W., 2018. Stochastic models of cell invasion  
614 with fluorescent cell cycle indicators. *Physica A* 510, 375-386.

615 [49] Tersoff, J., 1988. New empirical approach for the structure and energy of  
616 covalent systems. *Physical Review B* 37(12), 6991-7000.

617 [50] ThermoFisher Scientific. Available from:  
618 [https://www.thermofisher.com/au/en/home/life-science/cell-](https://www.thermofisher.com/au/en/home/life-science/cell-culture/mammalian-cell-culture/reagents/trypsin/trypsin-express.html)  
619 [culture/mammalian-cell-culture/reagents/trypsin/trypsin-express.html](https://www.thermofisher.com/au/en/home/life-science/cell-culture/mammalian-cell-culture/reagents/trypsin/trypsin-express.html) (Accessed:  
620 August, 2019).

621 [51] Treloar, K.K., Simpson, M.J. 2013. Sensitivity of edge detection methods for  
622 quantifying cell migration assays. *PLoS ONE* 8(6), e67389.

623 [52] Tremel, A., Cai, A., Tirtaatmadja, N., Hughes, B.D., Stevens, G.W., Landman,  
624 K.A., O'Connor, A.J., 2009. Cell migration and proliferation during monolayer  
625 formation and wound healing. *Chemical Engineering Science* 64, 247-253.

626 [53] Vo, B.N., Drovandi, C.C., Pettitt, Simpson, M.J., 2015. Quantifying uncertainty  
627 in parameter estimates for stochastic models of collective cell spreading using  
628 approximate Bayesian computation. *Mathematical Biosciences* 263, 133-142.

629 [54] Warne, D.J., Baker, R.E., Simpson, M.J., 2019. Simulation and inference  
630 algorithms for stochastic biochemical reaction networks: from basic concepts to  
631 state-of-the-art. *Journal of the Royal Society Interface* 16, 20180943.

- 632 [55] Wise, S.M., Lowengrub, J.S., Frieboes, H.B., Cristini, V., 2008. Three-  
633 dimensional multispecies nonlinear tumor growth—I Model and numerical method.  
634 Journal of Theoretical Biology 253(3), 524-543.
