# Supplementary material for: Continuum descriptions of spatial spreading for heterogeneous cell populations: theory and experiment
Source: bioRxiv or medRxiv preprint supplement (doi:10.1101/705434), 2019-08-16
Supplement: Supplementary file [file media-1.pdf]

# Supplementary material

Oleksii M Matsiaka<sup>1</sup>, Ruth E Baker<sup>2</sup>, \*Matthew J Simpson<sup>1</sup>

<sup>1</sup> *School of Mathematical Sciences, Queensland University of Technology (QUT)  
Brisbane, Queensland, Australia.*

<sup>2</sup> *Mathematical Institute, University of Oxford, Radcliffe Observatory Quarter,  
Woodstock Road, Oxford, United Kingdom.*

---

---

## Contents

|   |   |                                                                    |    |
|---|---|--------------------------------------------------------------------|----|
| 1 | A | Heterogeneity in the interaction force, $f_0$                      | 2  |
| 2 | B | Heterogeneity in the diffusivity, $D$                              | 7  |
| 3 | C | Discretisation scheme for the single-species homogeneous model and |    |
| 4 |   | heterogeneous three-species model                                  | 12 |

---

\* Corresponding author

*Email address:* `matthew.simpson@qut.edu.au`, *Telephone* + 617 3138 5241, *Fax* + 617 3138 2310 (\*Matthew J Simpson<sup>1</sup>).

## 5 **A Heterogeneity in the interaction force, $f_0$**

6 In this data set we explore the heterogeneity in the interaction force,  $f_0$ . Here we fix  
7 values of diffusivity,  $D = 250 \mu\text{m}^2/\text{h}$ , and cell size,  $\delta = 34 \mu\text{m}$ . To analyse performance  
8 of the single-species homogeneous model (Equation (3.9), Main paper) applied to a data  
9 generated by the three-species heterogeneous model (Equations (3.2)-(3.4), Main paper)  
10 we consider four interaction force distributions: (i) uniform distribution, Figure A.1(a),  
11 (ii) monotonically decreasing distribution, Figure A.2(a), (iii) non-monotonic distribu-  
12 tion, Figure A.3(a), and (iv) monotonically increasing distribution, Figure A.4(a). For all  
13 cases presented we are able to predict a position of the leading edge as well as accurately  
14 describe cell density profiles given by the three-species heterogeneous model.

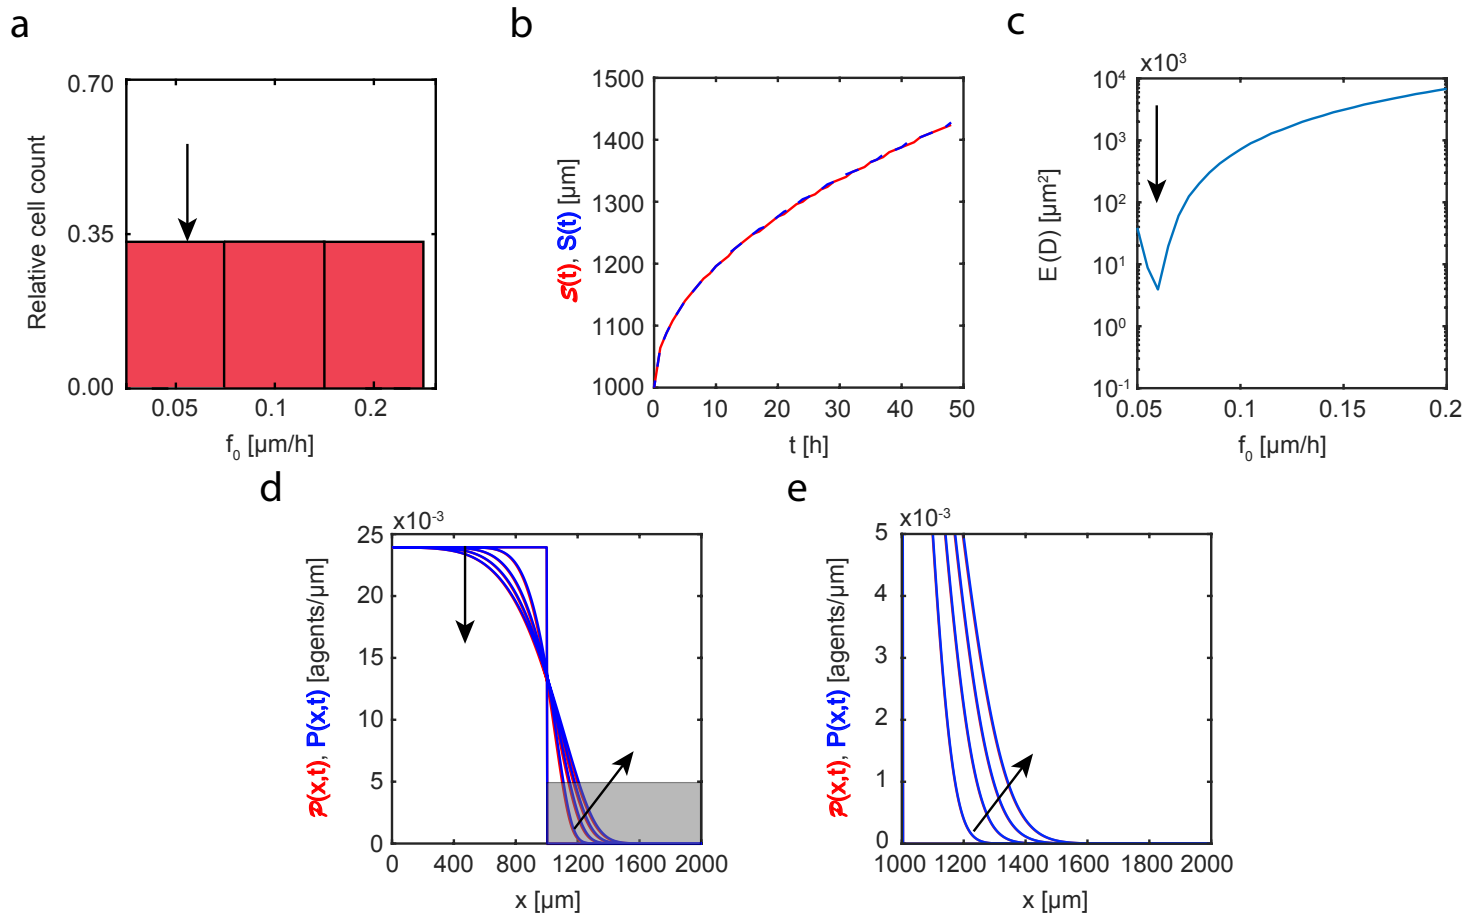

Fig. A.1. Set IIa. Heterogeneity in interaction forces: uniform distribution. (a): Interaction force distribution adopted in the three-species heterogeneous model, Equations (3.2)-(3.4) (Main paper). (b): Leading edge predicted by the three-species heterogeneous model,  $\mathcal{S}(t)$  (solid red), and the best-fit approximation given by the single-species homogeneous model,  $S(t)$  (blue dashed). (c): Error measure,  $E(f_0)$ , between the density profiles given by the three-species heterogeneous model and the profiles predicted by the single-species homogeneous model as a function of amplitude of the interaction force,  $f_0$ . (d)-(e): Cell density profiles predicted by the three-species heterogeneous model,  $\mathcal{P}(x,t)$  (solid red), superimposed with density profiles given by the single-species homogeneous model calibrated with the best-fit value of  $f_0$ ,  $P(x,t)$  (solid blue). The black arrow denotes the best-fit value of interaction force,  $f_0 = 0.055 \mu\text{m/h}$ . The continuum results for both models are presented at  $t = 0, 12, 24, 36$ , and  $48$  h. Black arrows denote the direction of increasing time. Results in (e) show a close-up comparison right near the leading edge, denoted by the gray shaded region in (d).

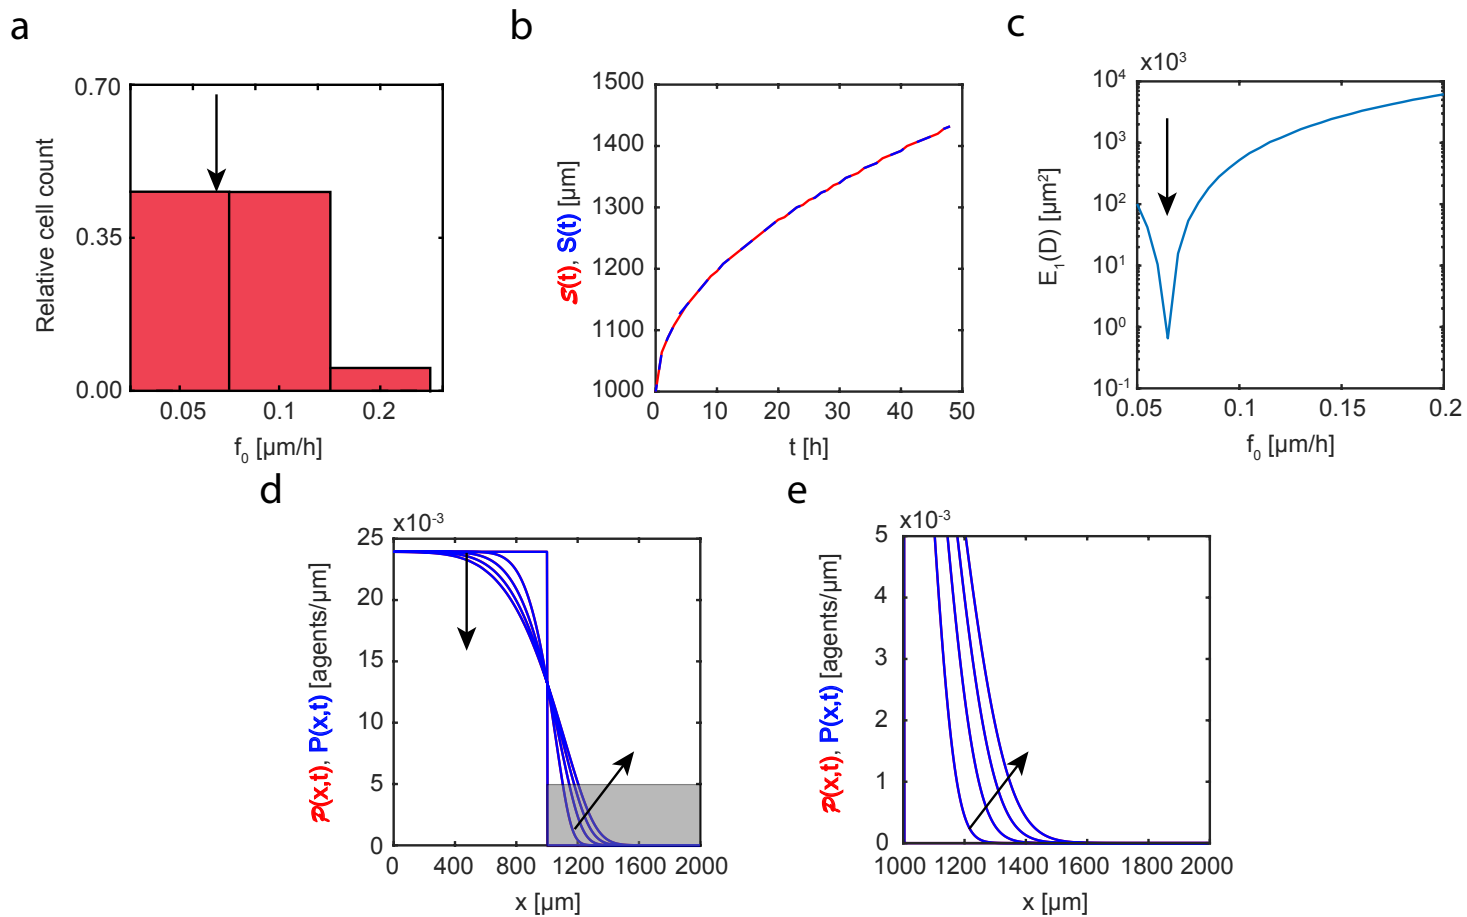

Fig. A.2. Set IIb. Heterogeneity in interaction forces: monotonically decreasing distribution. (a): Interaction force distribution adopted in the three-species heterogeneous model, Equations (3.2)-(3.4) (Main paper). (b): Leading edge predicted by the three-species heterogeneous model,  $S(t)$  (solid red), and the best-fit approximation given by the single-species homogeneous model,  $S(t)$  (blue dashed). (c): Error measure,  $E(f_0)$ , between the density profiles given by the three-species heterogeneous model and the profiles predicted by the single-species homogeneous model as a function of amplitude of the interaction force,  $f_0$ . (d)-(e): Cell density profiles predicted by the three-species heterogeneous model,  $\mathcal{P}(x, t)$  (solid red), superimposed with density profiles given by the single-species homogeneous model calibrated with the best-fit value of  $f_0$ ,  $P(x, t)$  (solid blue). The black arrow denotes the best-fit value of interaction force,  $f_0 = 0.06 \mu\text{m}/\text{h}$ . The continuum results for both models are presented at  $t = 0, 12, 24, 36$ , and  $48$  h. Black arrows denote the direction of increasing time. Results in (e) show a close-up comparison right near the leading edge, denoted by the gray shaded region in (d).

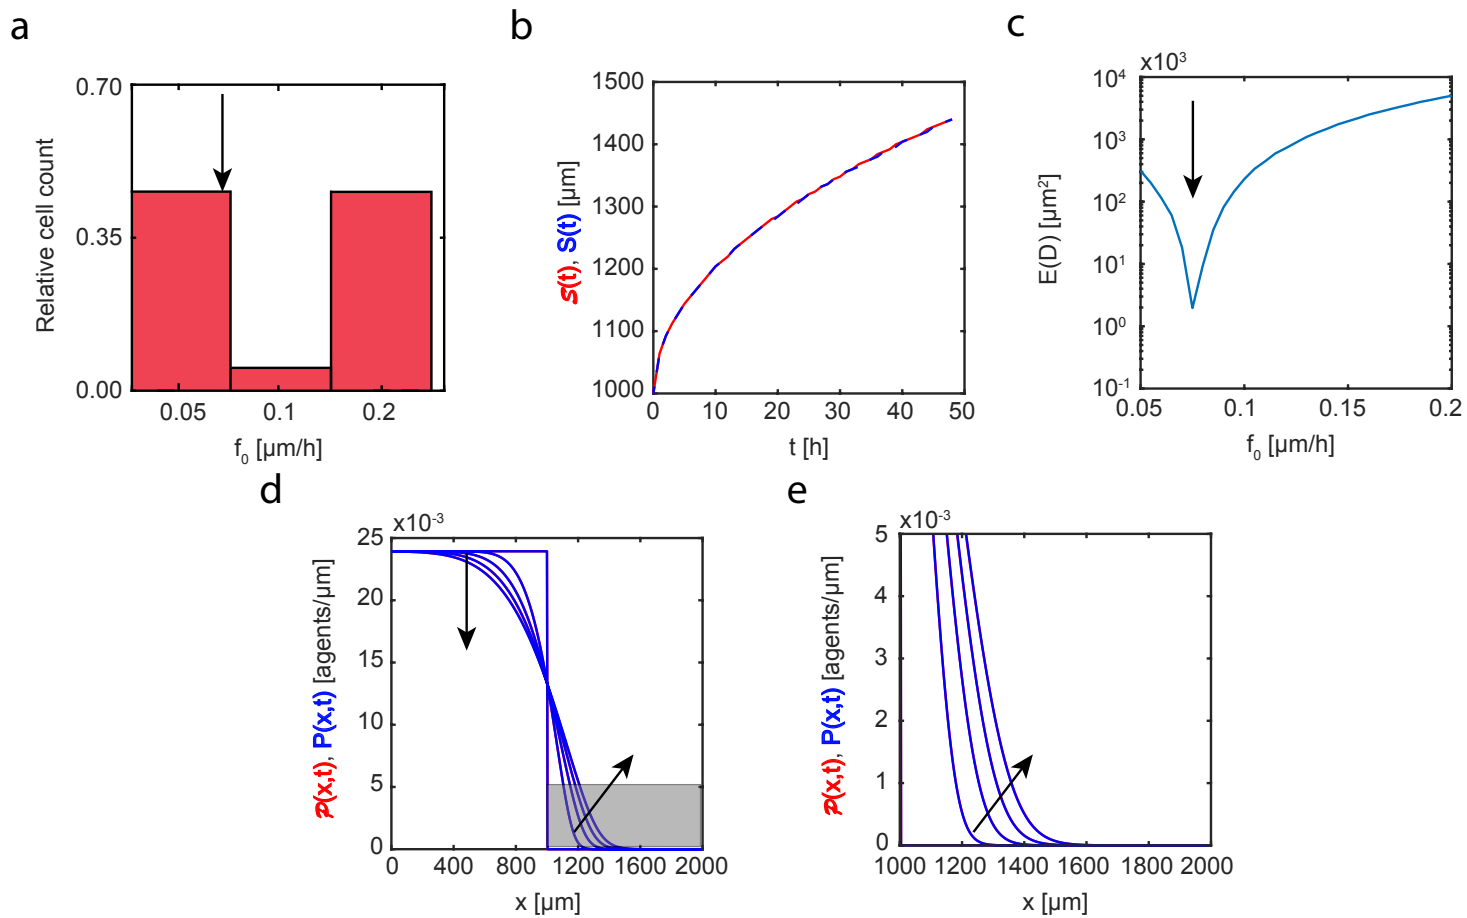

Fig. A.3. Set IIc. Heterogeneity in interaction forces: non-monotonic distribution. (a): Interaction force distribution adopted in the three-species heterogeneous model, Equations (3.2)-(3.4) (Main paper). (b): Leading edge predicted by the three-species heterogeneous model,  $S(t)$  (solid red), and the best-fit approximation given by the single-species homogeneous model,  $S(t)$  (blue dashed). (c): Error measure,  $E(f_0)$ , between the density profiles given by the three-species heterogeneous model and the profiles predicted by the single-species homogeneous model as a function of amplitude of the interaction force,  $f_0$ . (d)-(e): Cell density profiles predicted by the three-species heterogeneous model,  $\mathcal{P}(x, t)$  (solid red), superimposed with density profiles given by the single-species homogeneous model calibrated with the best-fit value of  $f_0$ ,  $P(x, t)$  (solid blue). The black arrow denotes the best-fit value of interaction force,  $f_0 = 0.065 \mu\text{m/h}$ . The continuum results for both models are presented at  $t = 0, 12, 24, 36$ , and  $48$  h. Black arrows denote the direction of increasing time. Results in (e) show a close-up comparison right near the leading edge, denoted by the gray shaded region in (d).

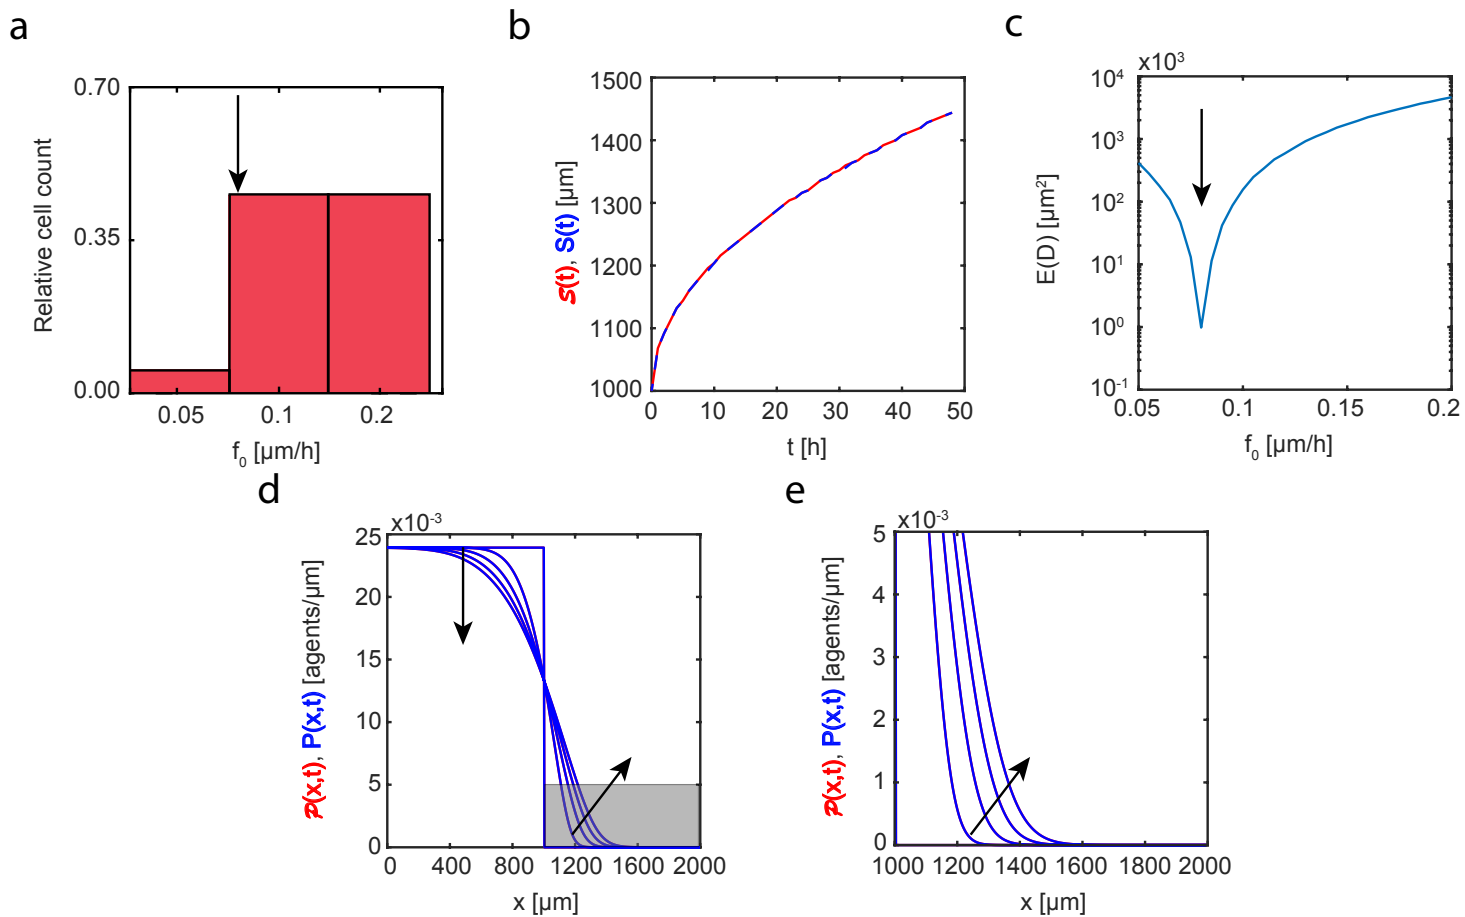

Fig. A.4. Set II d. Heterogeneity in interaction forces: monotonically increasing distribution. (a): Interaction force distribution adopted in the three-species heterogeneous model, Equations (3.2)-(3.4) (Main paper). (b): Leading edge predicted by the three-species heterogeneous model,  $S(t)$  (solid red), and the best-fit approximation given by the single-species homogeneous model,  $S(t)$  (blue dashed). (c): Error measure,  $E(f_0)$ , between the density profiles given by the three-species heterogeneous model and the profiles predicted by the single-species homogeneous model as a function of amplitude of the interaction force,  $f_0$ . (d)-(e): Cell density profiles predicted by the three-species heterogeneous model,  $\mathcal{P}(x, t)$  (solid red), superimposed with density profiles given by the single-species homogeneous model calibrated with the best-fit value of  $f_0$ ,  $P(x, t)$  (solid blue). The black arrow denotes the best-fit value of interaction force,  $f_0 = 0.07 \mu\text{m}/\text{h}$ . The continuum results for both models are presented at  $t = 0, 12, 24, 36,$  and  $48$  h. Black arrows denote the direction of increasing time. Results in (e) show a close-up comparison right near the leading edge, denoted by the gray shaded region in (d).

## 15 **B Heterogeneity in the diffusivity, $D$**

16 In this data set we explore the heterogeneity in the diffusivity,  $D$ . Here we fix values of  
17 amplitude of interaction forces,  $f_0 = 0.05 \mu\text{m}/\text{h}$ , and cell size,  $\delta = 34 \mu\text{m}$ . To analyse per-  
18 formance of the single-species homogeneous model (Equation (3.9), Main paper) applied  
19 to a data generated by the three-species heterogeneous model (Equations (3.2)-(3.4), Main  
20 paper) we consider four different diffusivity distributions: (i) uniform distribution, Figure  
21 B.1(a), (ii) monotonically decreasing distribution, Figure B.2(a), (iii) non-monotonic dis-  
22 tribution, Figure B.3(a), and (iv) monotonically increasing distribution, Figure B.4(a).  
23 For all cases presented we are able to predict a position of the leading edge as well as  
24 accurately describe cell density profiles given by the three-species heterogeneous model.

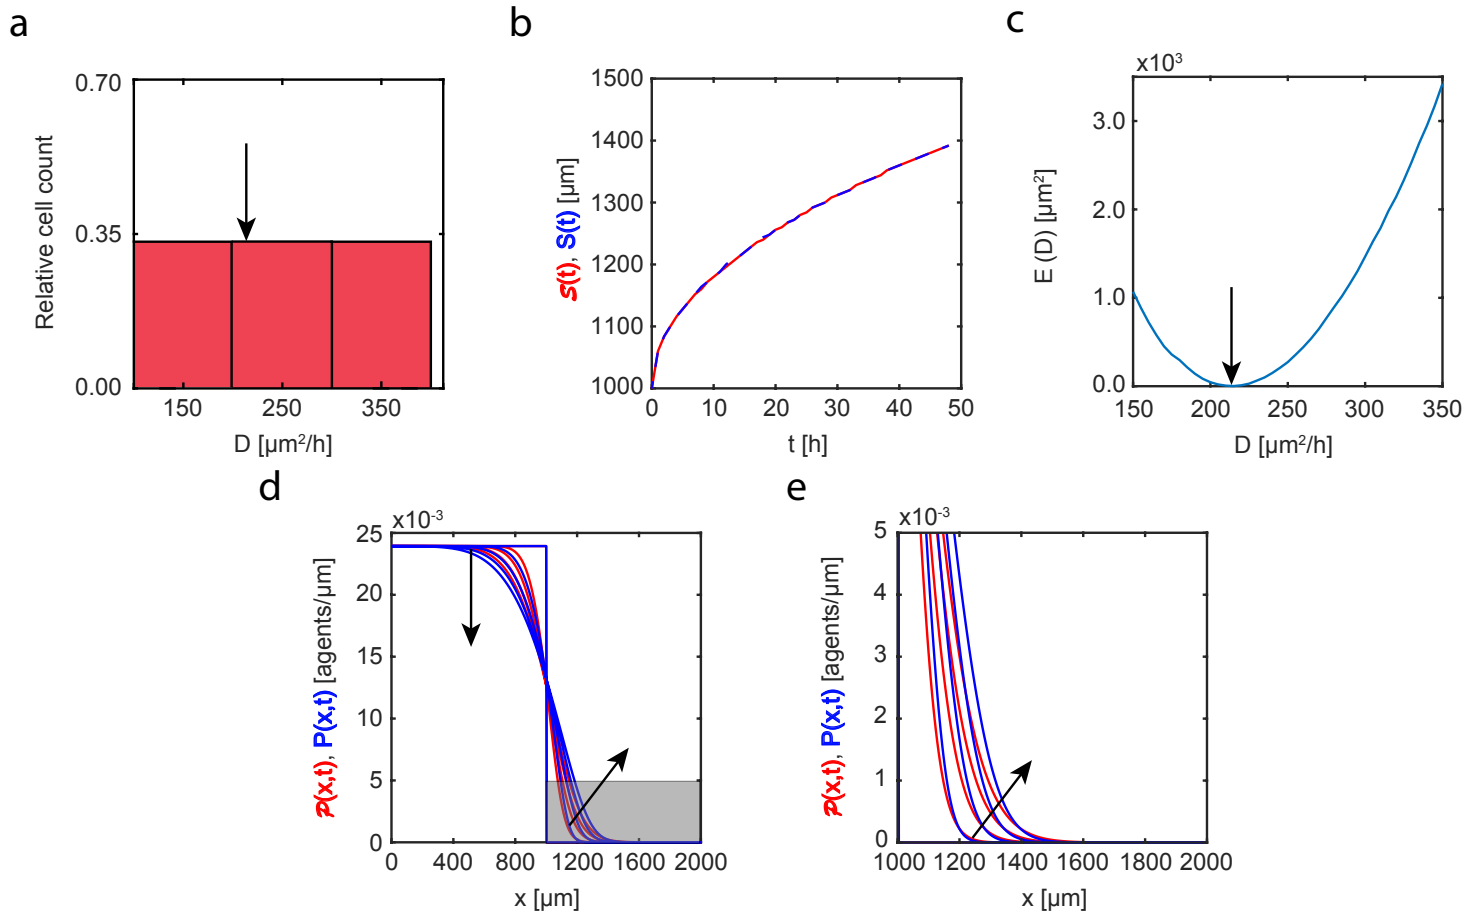

Fig. B.1. Set IIIa. Heterogeneity in diffusivity: uniform distribution. (a): Diffusivity distribution adopted in the three-species heterogeneous model, Equations (3.2)-(3.4) (Main paper). (b): Leading edge predicted by the three-species heterogeneous model,  $\mathcal{S}(t)$  (solid red), and the best-fit approximation given by the single-species homogeneous model,  $S(t)$  (blue dashed). (c): Error measure,  $E(D)$ , between the density profiles given by the three-species heterogeneous model and the profiles predicted by the single-species homogeneous model as a function of diffusivity,  $D$ . The black arrow denotes the best-fit value of diffusivity,  $D = 215 \mu\text{m}^2/\text{h}$ . (d)-(e): Cell density profiles predicted by the three-species heterogeneous model,  $\mathcal{P}(x, t)$  (solid red), superimposed with density profiles given by the single-species homogeneous model calibrated with the best-fit value of  $D$ ,  $P(x, t)$  (solid blue). The continuum results for both models are presented at  $t = 0, 12, 24, 36,$  and  $48$  h. Black arrows denote the direction of increasing time. Results in (e) show a close-up comparison right near the leading edge, denoted by the gray shaded region in (d).



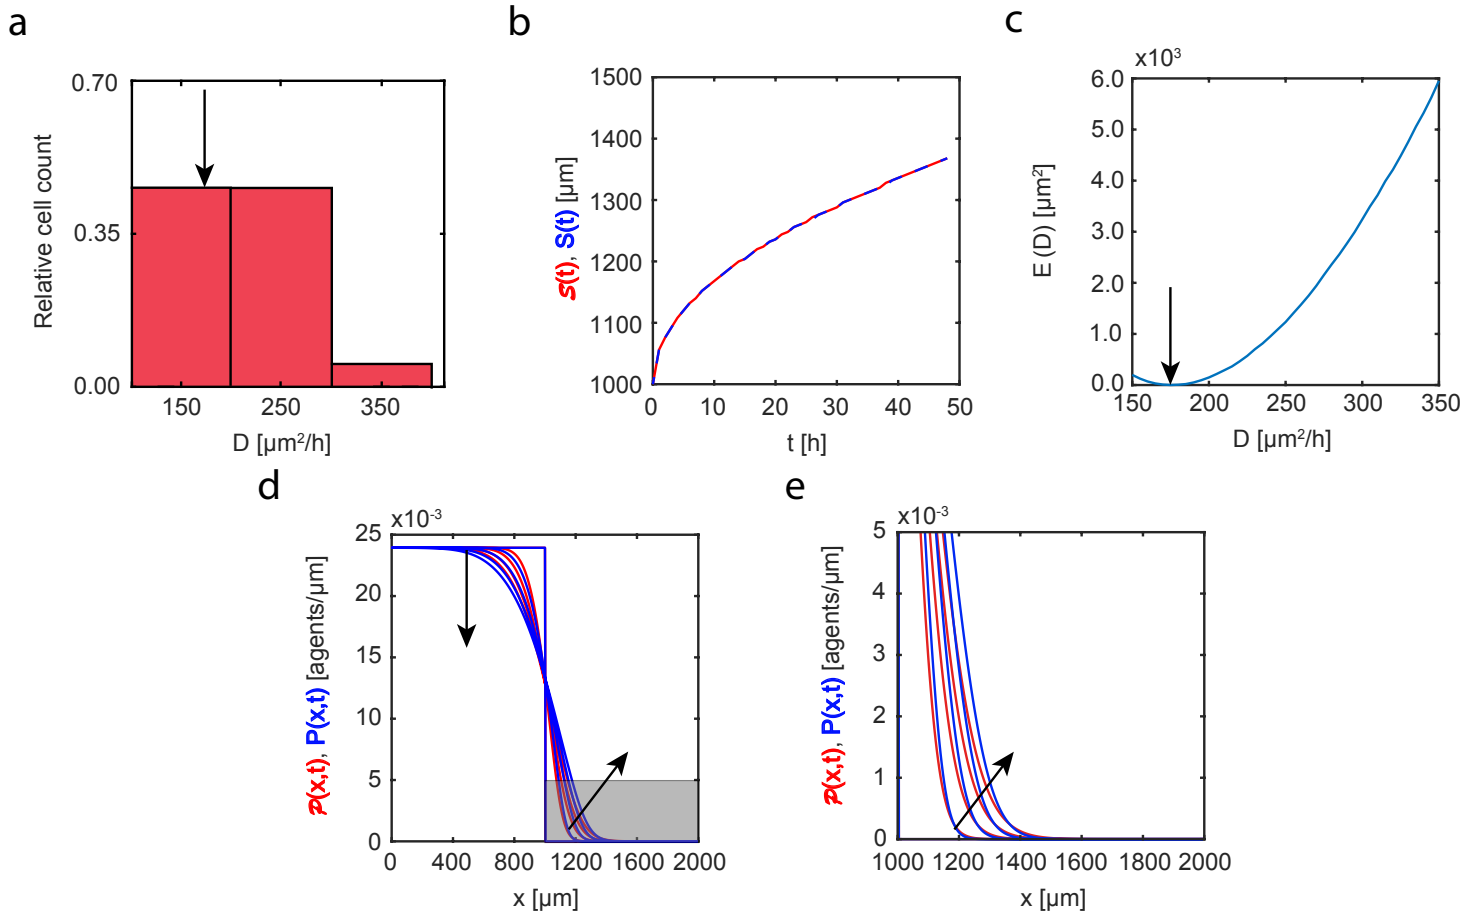

Fig. B.2. Set IIIb. Heterogeneity in diffusivity: monotonically decreasing distribution. (a): Diffusivity distribution adopted in the three-species heterogeneous model, Equations (3.2)-(3.4) (Main paper). (b): Leading edge predicted by the three-species heterogeneous model,  $\mathcal{S}(t)$  (solid red), and the best-fit approximation given by the single-species homogeneous model,  $S(t)$  (blue dashed). (c): Error measure,  $E(D)$ , between the density profiles given by the three-species heterogeneous model and the profiles predicted by the single-species homogeneous model as a function of diffusivity,  $D$ . The black arrow denotes the best-fit value of diffusivity,  $D = 175 \mu\text{m}^2/\text{h}$ . (d)-(e): Cell density profiles predicted by the three-species heterogeneous model,  $\mathcal{P}(x,t)$  (solid red), superimposed with density profiles given by the single-species homogeneous model calibrated with the best-fit value of  $D$ ,  $P(x,t)$  (solid blue). The continuum results for both models are presented at  $t = 0, 12, 24, 36,$  and  $48$  h. Black arrows denote the direction of increasing time. Results in (e) show a close-up comparison right near the leading edge, denoted by the gray shaded region in (d).

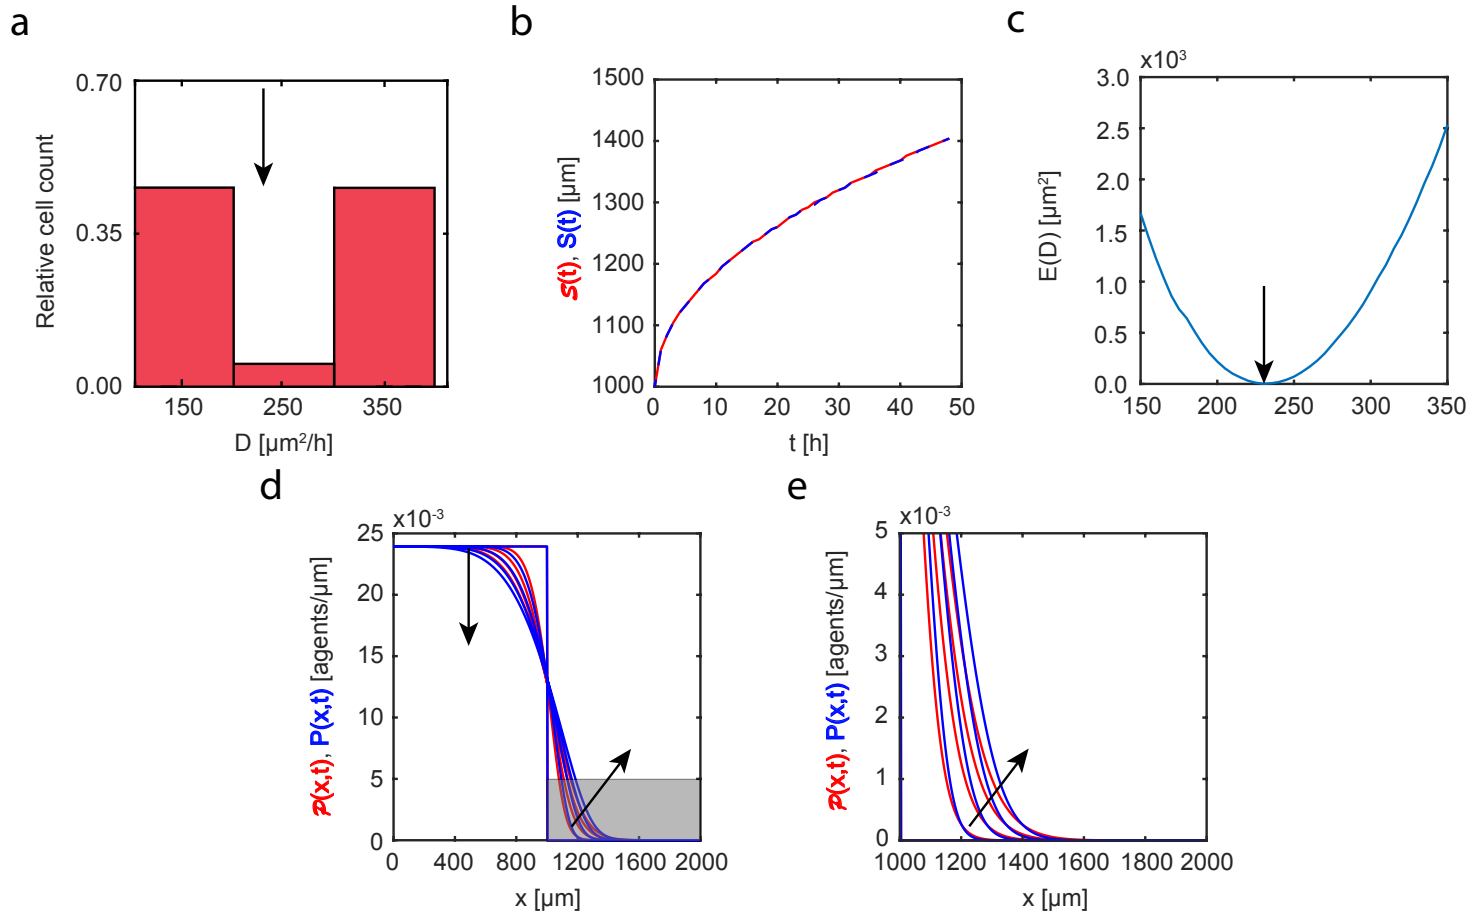

Fig. B.3. Set IIIc. Heterogeneity in diffusivity: non-monotonic distribution. (a): Diffusivity distribution adopted in the three-species heterogeneous model, Equations (3.2)-(3.4) (Main paper). (b): Leading edge predicted by the three-species heterogeneous model,  $\mathcal{S}(t)$  (solid red), and the best-fit approximation given by the single-species homogeneous model,  $S(t)$  (blue dashed). (c): Error measure,  $E(D)$ , between the density profiles given by the three-species heterogeneous model and the profiles predicted by the single-species homogeneous model as a function of diffusivity,  $D$ . The black arrow denotes the best-fit value of diffusivity,  $D = 230 \mu\text{m}^2/\text{h}$ . (d)-(e): Cell density profiles predicted by the three-species heterogeneous model,  $\mathcal{P}(x, t)$  (solid red), superimposed with density profiles given by the single-species homogeneous model calibrated with the best-fit value of  $D$ ,  $P(x, t)$  (solid blue). The continuum results for both models are presented at  $t = 0, 12, 24, 36,$  and  $48$  h. Black arrows denote the direction of increasing time. Results in (e) show a close-up comparison right near the leading edge, denoted by the gray shaded region in (d).

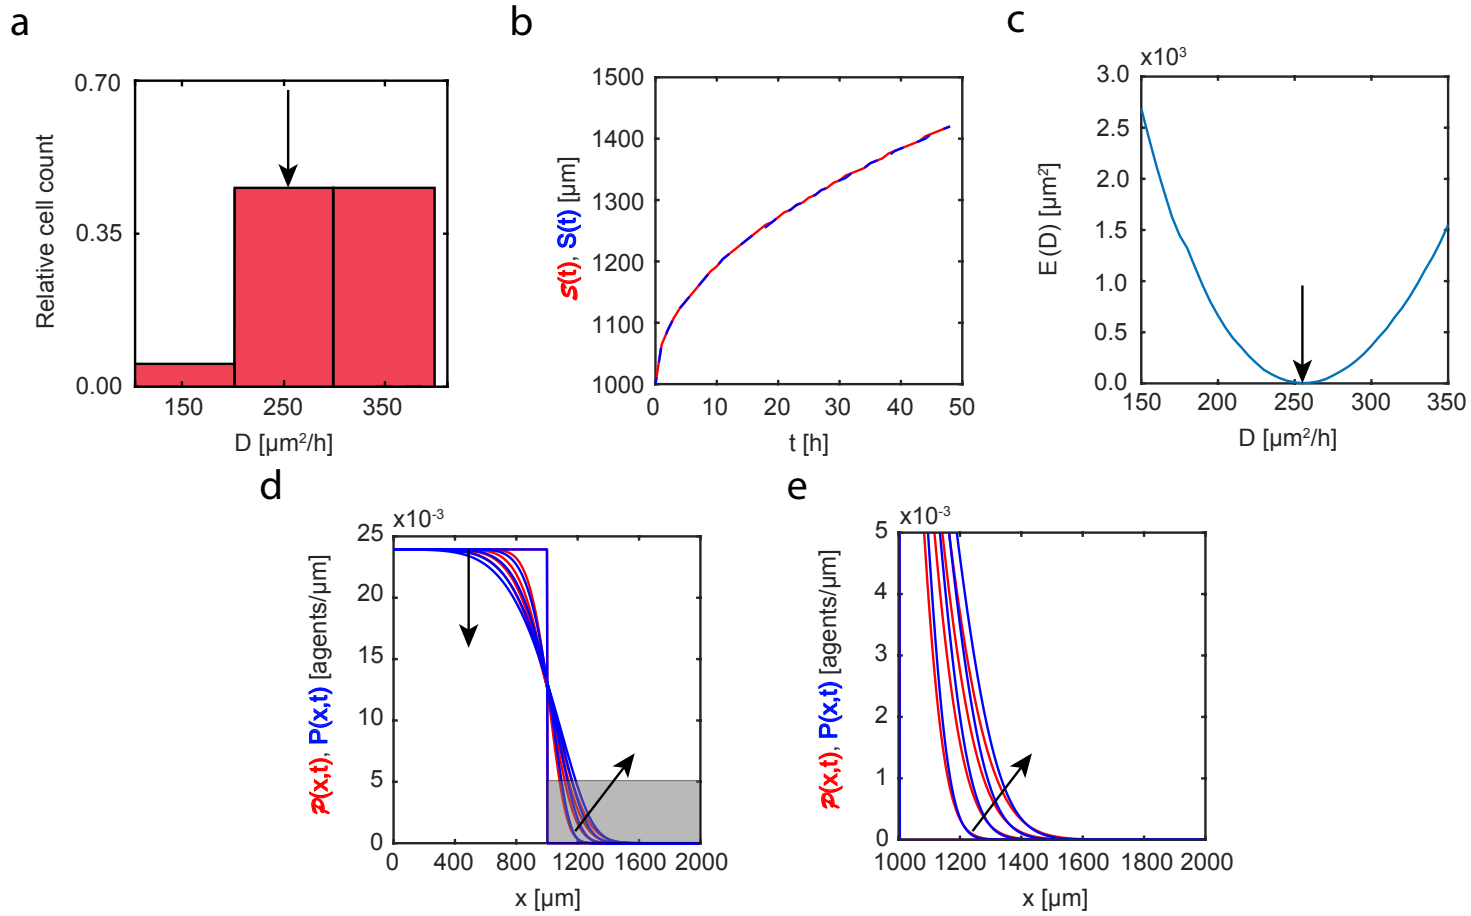

Fig. B.4. Set IIIId. Heterogeneity in diffusivity: monotonically increasing distribution. (a): Diffusivity distribution adopted in the three-species heterogeneous model, Equations (3.2)-(3.4) (Main paper). (b): Leading edge as predicted by the three-species heterogeneous model,  $\mathcal{S}(t)$  (solid red), and the best-fit approximation given by the single-species homogeneous model,  $S(t)$  (blue dashed). (c): Error measure,  $E(D)$ , between the density profiles given by the three-species heterogeneous model and the profiles predicted by the single-species homogeneous model as a function of diffusivity,  $D$ . The black arrow denotes the best-fit value of diffusivity,  $D = 255 \mu\text{m}^2/\text{h}$ . (d)-(e): Cell density profiles as predicted by the three-species heterogeneous model,  $\mathcal{P}(x,t)$  (solid red), superimposed with density profiles given by the single-species homogeneous model calibrated with the best-fit value of  $D$ ,  $P(x,t)$  (solid blue). The continuum results for both models are presented at  $t = 0, 12, 24, 36,$  and  $48$  h. Black arrows denote the direction of increasing time. Results in (e) show a close-up comparison right near the leading edge, denoted by the gray shaded region in (d).

25 **C Discretisation scheme for the single-species homogeneous model and het-**  
 26 **erogeneous three-species model**

27 In this section we present the discretisation scheme used to obtain the numerical solution  
 28 of the single-species homogeneous model in the mean-field framework. In summary, the  
 29 governing equation that we consider is as follows,

$$\frac{\partial P(x, t)}{\partial t} = D\Delta P(x, t) - (N - 1)\nabla(P(x, t) V(x, t)), \quad (\text{C.1})$$

30 where

$$V(x, t) = \int F(x - y) P(y, t) dy \quad (\text{C.2})$$

31 is the velocity field induced by intercellular interaction forces, and  $N = 36$  is the total  
 32 number of cells in the simulations.

33 To present the numerical scheme as succinctly as possible, we define

$$\sigma(x, y, t) = F(x - y) P(y, t), \quad (\text{C.3})$$

$$\begin{aligned} I_s &= P(x_s, t) \int \sigma(x_s, y) dy \\ &= P(x_s, t) \frac{h}{2} \sum_i \left[ \sigma(x_s, y_{i+1}) + \sigma(x_s, y_i) \right] + O(h^2), \end{aligned} \quad (\text{C.4})$$

34 where the rectangle rule with step  $h$  is used for numerical integration, and indices  $s$  and  
 35  $i$  denote the equally-spaced spatial mesh nodes.

36 Using the definitions in Equations (C.3)-(C.4), we apply the method of lines to Equation  
 37 (C.1) and obtain the following system of coupled ordinary differential equations,

$$\frac{dP_i}{dt} = \frac{D}{h^2} \left[ P_{i+1} - 2P_i + P_{i-1} \right] - (N - 1) \frac{1}{2h} \left[ I_{i+1} - I_{i-1} \right], \quad (\text{C.5})$$

38 where index  $i$  denotes a spatial mesh node. This systems of ordinary differential equations  
 39 is solved using an explicit forward Euler algorithm with constant time steps of duration  
 40  $\Delta t$ .

41 Similarly, the three-species model is given by three coupled integro-PDEs in the following  
 42 form,

$$\frac{\partial p^{(1)}}{\partial t} = D_1 \Delta p^{(1)} - (n_1 - 1) \nabla(p^{(1)} V^{(11)}) - n_2 \nabla(p^{(1)} V^{(12)}) - n_3 \nabla(p^{(1)} V^{(13)}), \quad (\text{C.6})$$

$$\frac{\partial p^{(2)}}{\partial t} = D_2 \Delta p^{(2)} - (n_2 - 1) \nabla(p^{(2)} V^{(22)}) - n_1 \nabla(p^{(2)} V^{(21)}) - n_3 \nabla(p^{(2)} V^{(23)}), \quad (\text{C.7})$$

$$\frac{\partial p^{(3)}}{\partial t} = D_3 \Delta p^{(3)} - (n_3 - 1) \nabla(p^{(3)} V^{(33)}) - n_1 \nabla(p^{(3)} V^{(31)}) - n_2 \nabla(p^{(3)} V^{(32)}), \quad (\text{C.8})$$

$$V^{(lk)} = \int_{\Omega} F^{(lk)}(x - y) p^{(k)}(y, t) dy. \quad (\text{C.9})$$

43 We define

$$\sigma^{lk}(x, y, t) = F^{(lk)}(x - y) p^{(k)}(y, t), \quad (\text{C.10})$$

$$\begin{aligned} I_s^{lk} &= p^{(l)}(x_s, t) \int \sigma^{lk}(x_s, y) dy \\ &= p^{(l)}(x_s, t) \frac{h}{2} \sum_i \left[ \sigma^{lk}(x_s, y_{i+1}) + \sigma^{lk}(x_s, y_i) \right] + O(h^2), \end{aligned} \quad (\text{C.11})$$

44 where  $k = 1, 2, 3$  is the subpopulation index, indices  $i$  and  $s$  denote the equally-spaced  
45 spatial mesh nodes, and  $h$  is spatial discretisation step.

46 Using the definitions in Equations (C.10)-(C.11), we apply the method of lines to Equa-  
47 tions (C.6)-(C.8) and obtain the following system of coupled ordinary differential equa-  
48 tions,

$$\frac{dp_i^{(k)}}{dt} = \frac{D_k}{h^2} \left[ P_{i+1}^{(k)} - 2P_i^{(k)} + P_{i-1}^{(k)} \right] - (n_k - 1) \frac{1}{2h} \left[ I_{i+1}^{kk} - I_{i-1}^{kk} \right] - \sum_{l \neq k} n_l \frac{1}{2h} \left[ I_{i+1}^{lk} - I_{i-1}^{lk} \right], \quad (\text{C.12})$$

49 where  $k = 1, 2, 3$  is the subpopulation index.
